# Supplementary material for: Mechanisms of sensory adaptation and inhibition of the cold and menthol receptor TRPM8
Source: PubMed Central journal article supplement — Sci Adv. 2024 Aug 2;10(31):eadp2211. doi: 10.1126/sciadv.adp2211 (PMC11296349; doi:10.1126/sciadv.adp2211), 2024-08-02
Supplement: sciadv.adp2211_sm.pdf [file sciadv.adp2211_sm.pdf]

Supplementary Materials for  
**Mechanisms of sensory adaptation and inhibition of the cold and menthol  
receptor TRPM8**

Ying Yin *et al.*

Corresponding author: Seok-Yong Lee, seok-yong.lee@duke.edu

*Sci. Adv.* **10**, eadp2211 (2024)  
DOI: 10.1126/sciadv.adp2211

**This PDF file includes:**

Figs. S1 to S17  
Table S1

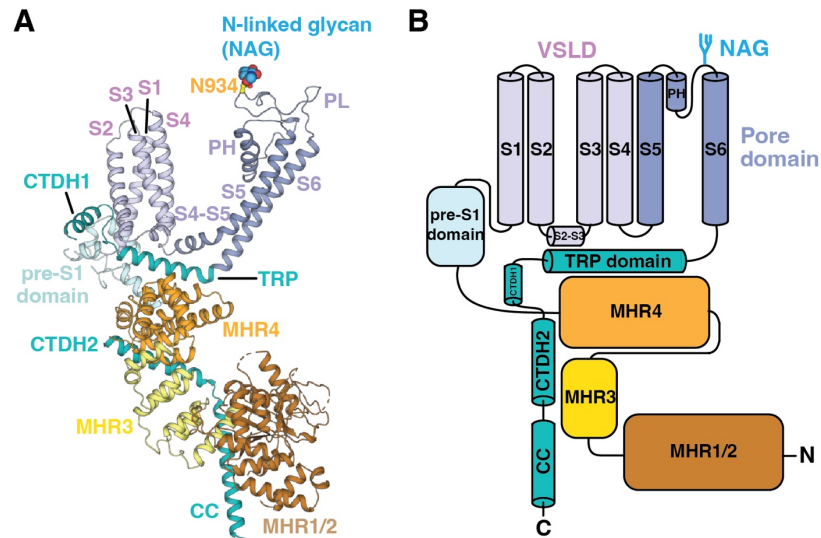

**Fig. S1. Topology of TRPM8<sub>MM</sub> channels.**

(A and B) Structural model (A) and cartoon diagram (B) delineating the topology of a single TRPM8<sub>MM</sub> protomer. The TRPM8<sub>MM</sub>\_AMTB structure from the current study was used for illustration, where the complete outer pore domain and an *N*-linked glycosylation moiety (NAG, blue) on the pore loop (PL) were resolved.

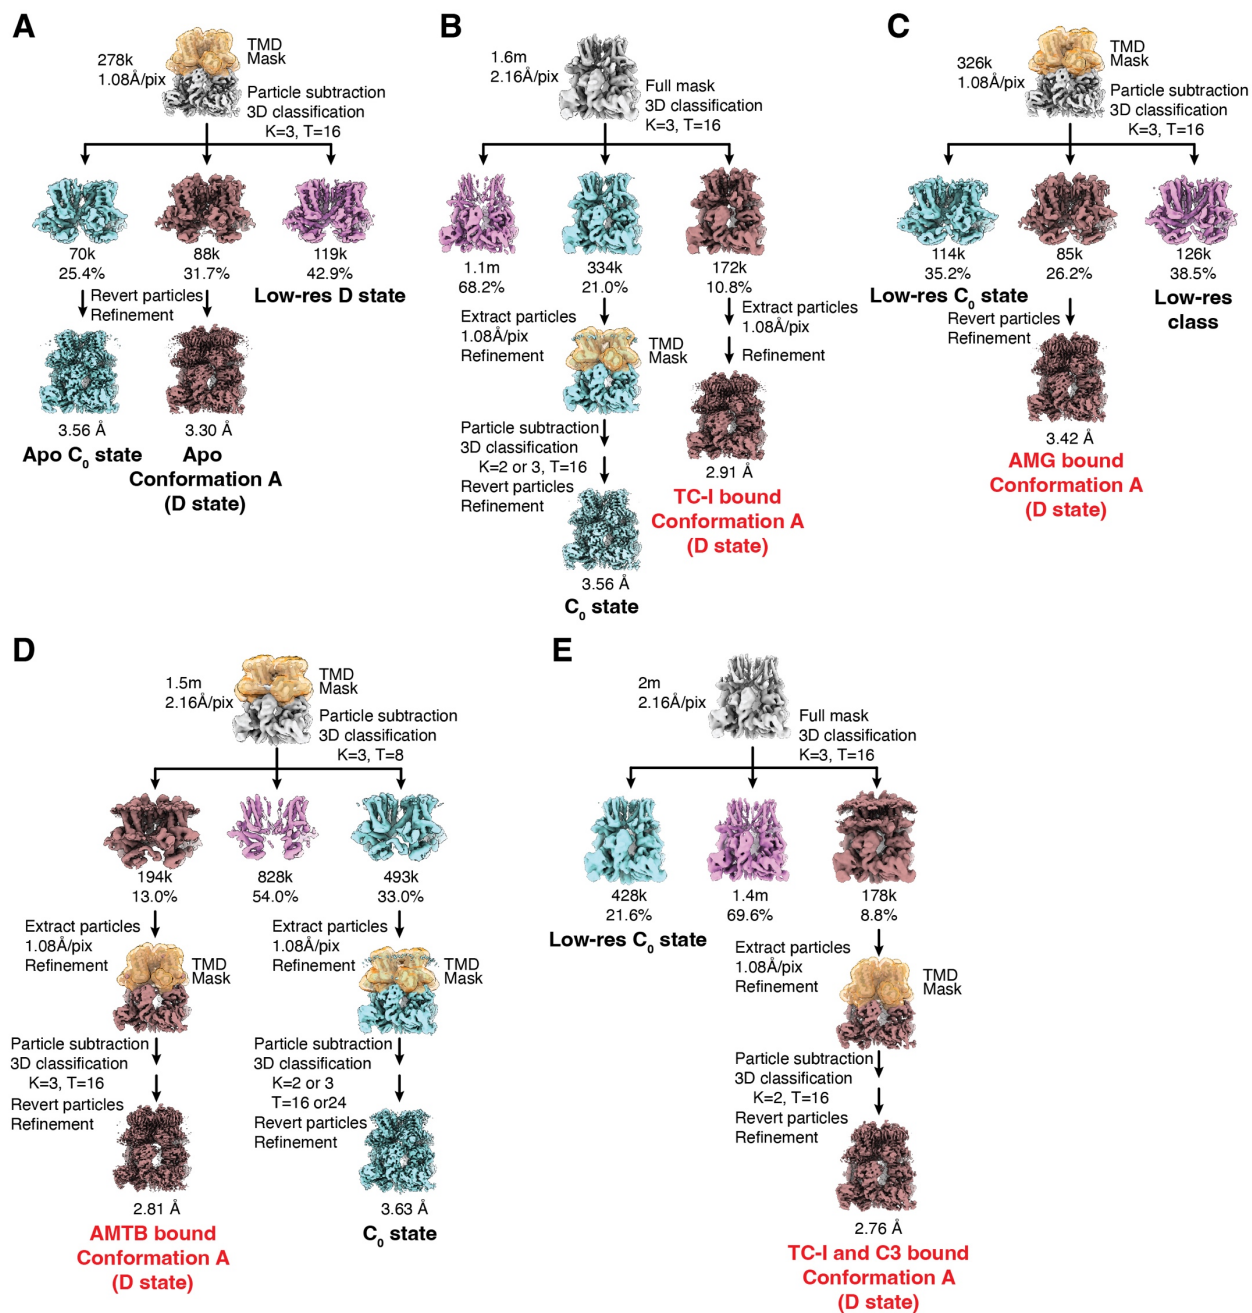

**Fig. S2. Cryo-EM 3D classification of antagonists-bound TRPM8<sub>MM</sub> structures.**

(A) TRPM8<sub>MM</sub> sample purified in LMNG and CHS in the absence of antagonists yielded 3D reconstructions in the distinct C<sub>0</sub> state and conformation A (D state).

(B to E) Cryo-EM 3D classification workflows to dissect the antagonist-bound conformation A reconstruction (D state) from the C<sub>0</sub>-state reconstruction without antagonist bound and/or from the low-resolution reconstructions. Results are shown for TRPM8<sub>MM</sub> purified in LMNG and CHS and frozen in the presence of TC-I (B), AMG (C), AMTB (D), and TC-I plus C3 (E). TMD masks used for particle subtraction and 3D classification jobs in RELION are shown in transparent orange color.

**A** $C_0$ -state reconstruction in the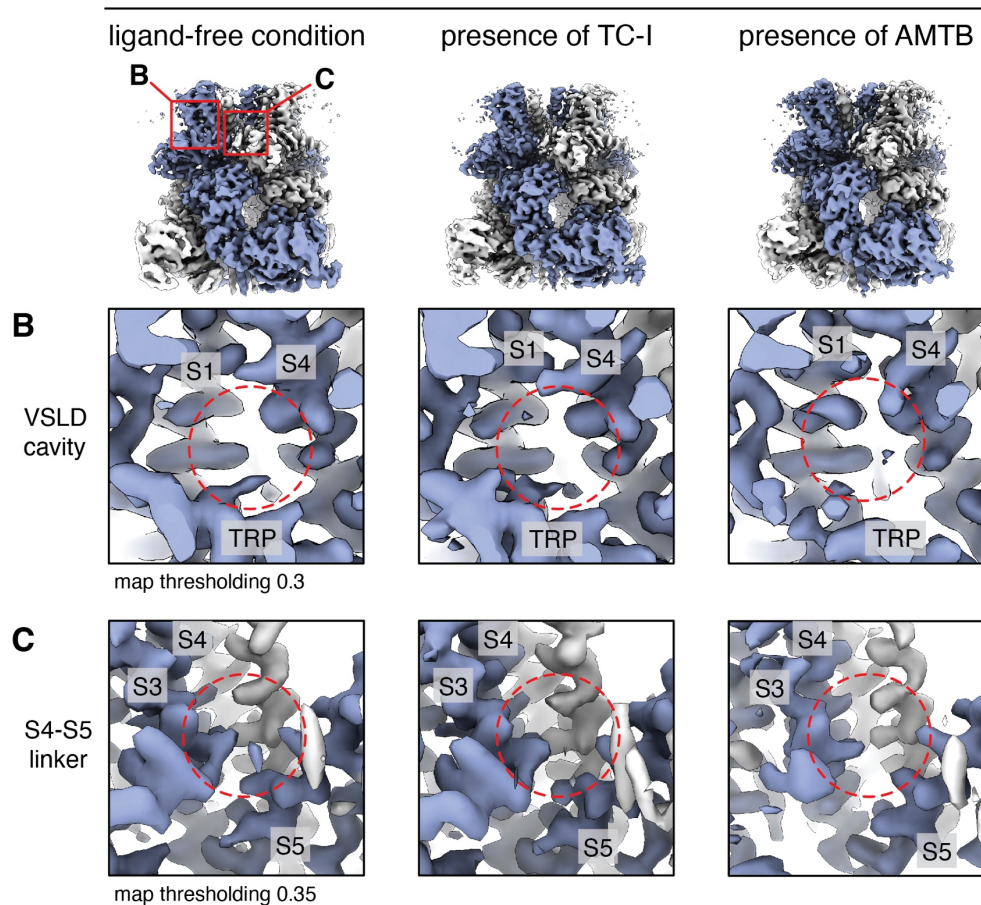**Fig. S3. The absence of strong EM density for antagonists in the  $C_0$ -state 3D reconstructions.**

(A) 3D reconstructions in the  $C_0$ -state conformation resolved from cryo-EM datasets prepared in the ligand-free condition (left), in the presence of TC-I (center) and AMTB (right). Thresholding 0.2, 0.23, 0.19.

(B and C) Close-up views at the VSLD cavity (B) and the S4-S5 linker (C) from (A). Red dashed circles highlight the absence of strong and unambiguous EM densities for antagonists at the corresponding locations. Thresholding 0.3 in (B) and 0.35 in (C).

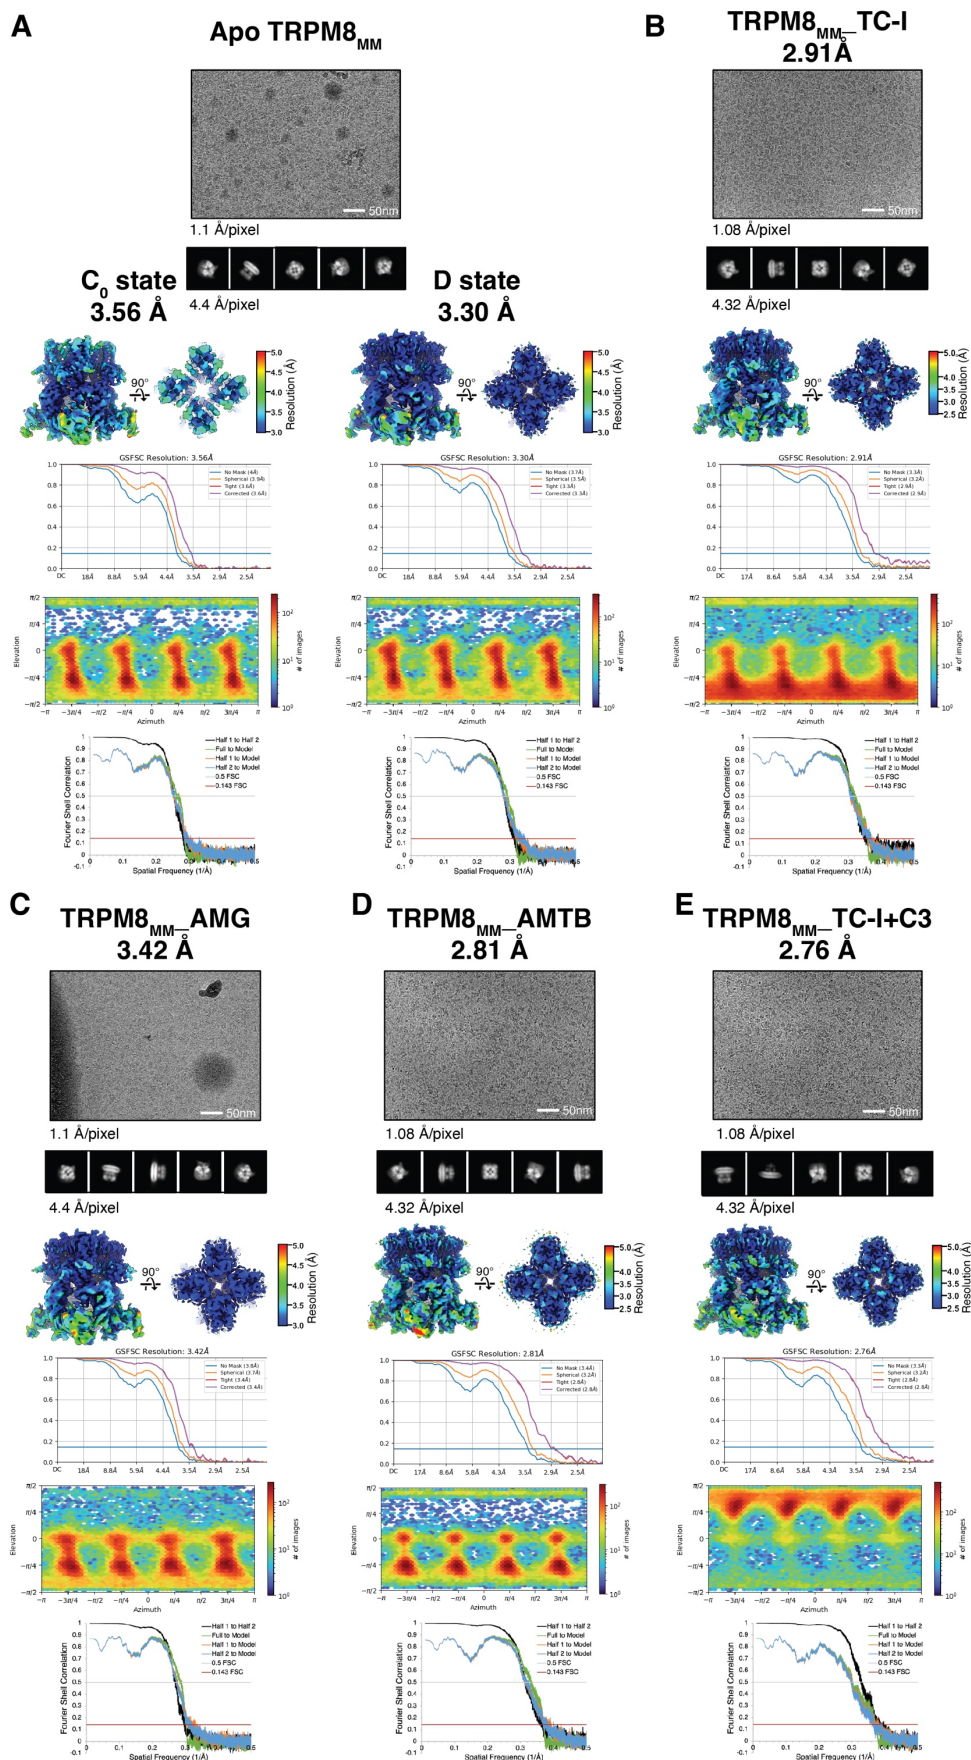

**Fig. S4. Cryo-EM data collection and validation, part I.**

(A to E) Representative micrographs, 2D classification images, local resolution estimation, the Fourier shell correlation (FSC) curves of the final 3D reconstruction with different masking calculated in CryoSPARC, orientation distribution diagram, and the FSC curves between model and full- or half-maps calculated in PHENIX. Results are shown for cryo-EM datasets of TRPM8<sub>MM</sub> prepared in the absence of antagonists or agonists (A), and in the presence of TC-I (B), AMG (C), AMTB (D), and TC-I plus C3 (E), respectively. The pixel sizes of micrographs and 2D class averages are specified below the image.

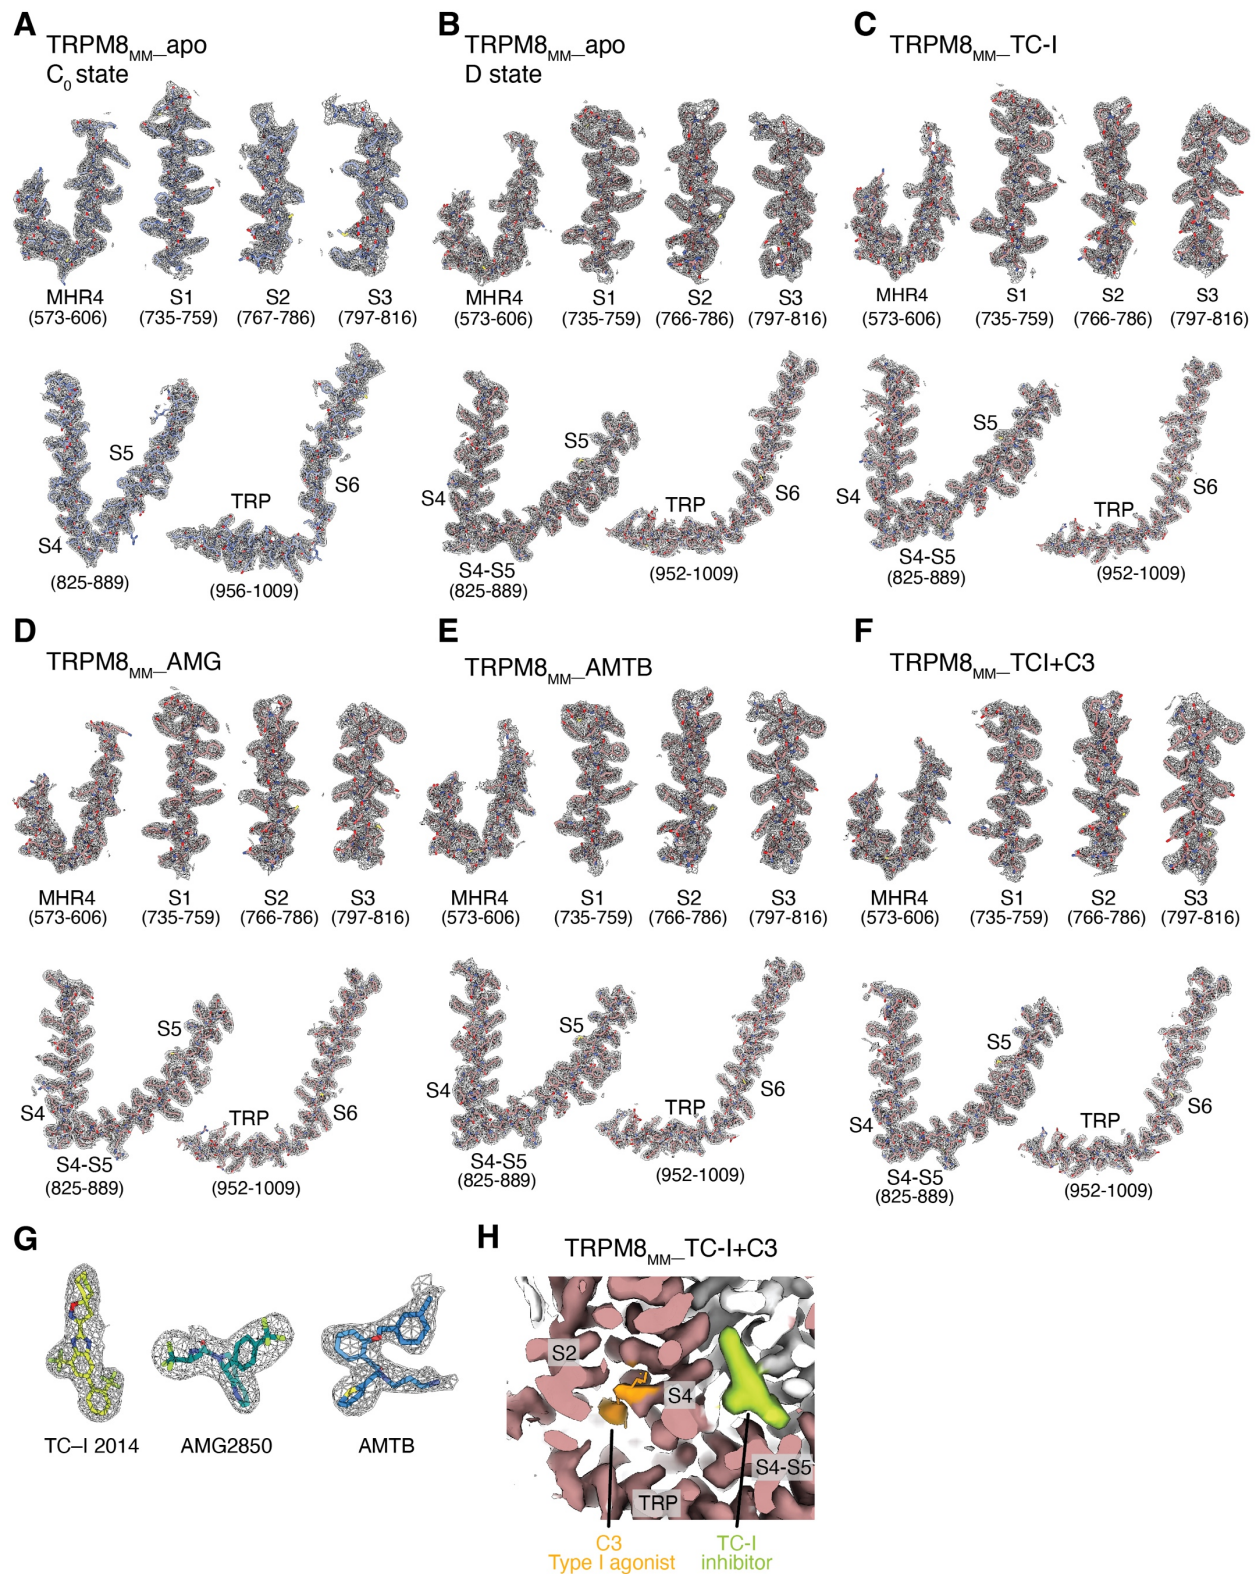

**Fig. S5. Cryo-EM density quality for the TRPM8<sub>MM</sub> structures.**

(A to F) Representative EM densities (gray mesh) for key structural elements in C<sub>0</sub>-state TRPM8<sub>MM</sub>-apo (A), D-state TRPM8<sub>MM</sub>-apo (B), TRPM8<sub>MM</sub>-TC-I (C), TRPM8<sub>MM</sub>-AMG (D), TRPM8<sub>MM</sub>-AMTB (E), and TRPM8<sub>MM</sub>-TCI+C3 (F). Thresholding 0.14 or 0.2 in (A), 0.2 in (B to F). Residue ranges are indicated.

**(G)** EM densities (gray mesh) for antagonists TC-I, AMG, and AMTB. Thresholding 0.2.

**(H)** Close-up view depicting EM densities for C3 (orange) in the VSLD cavity and for TC-I (lime) at the S4-S5 linker in the TRPM8<sub>MM</sub>\_TC-I+C3 reconstruction. Neighboring protomers colored in brown and gray. Thresholding 0.22. Residue sidechains and antagonists are shown as sticks in **(A to G)**.

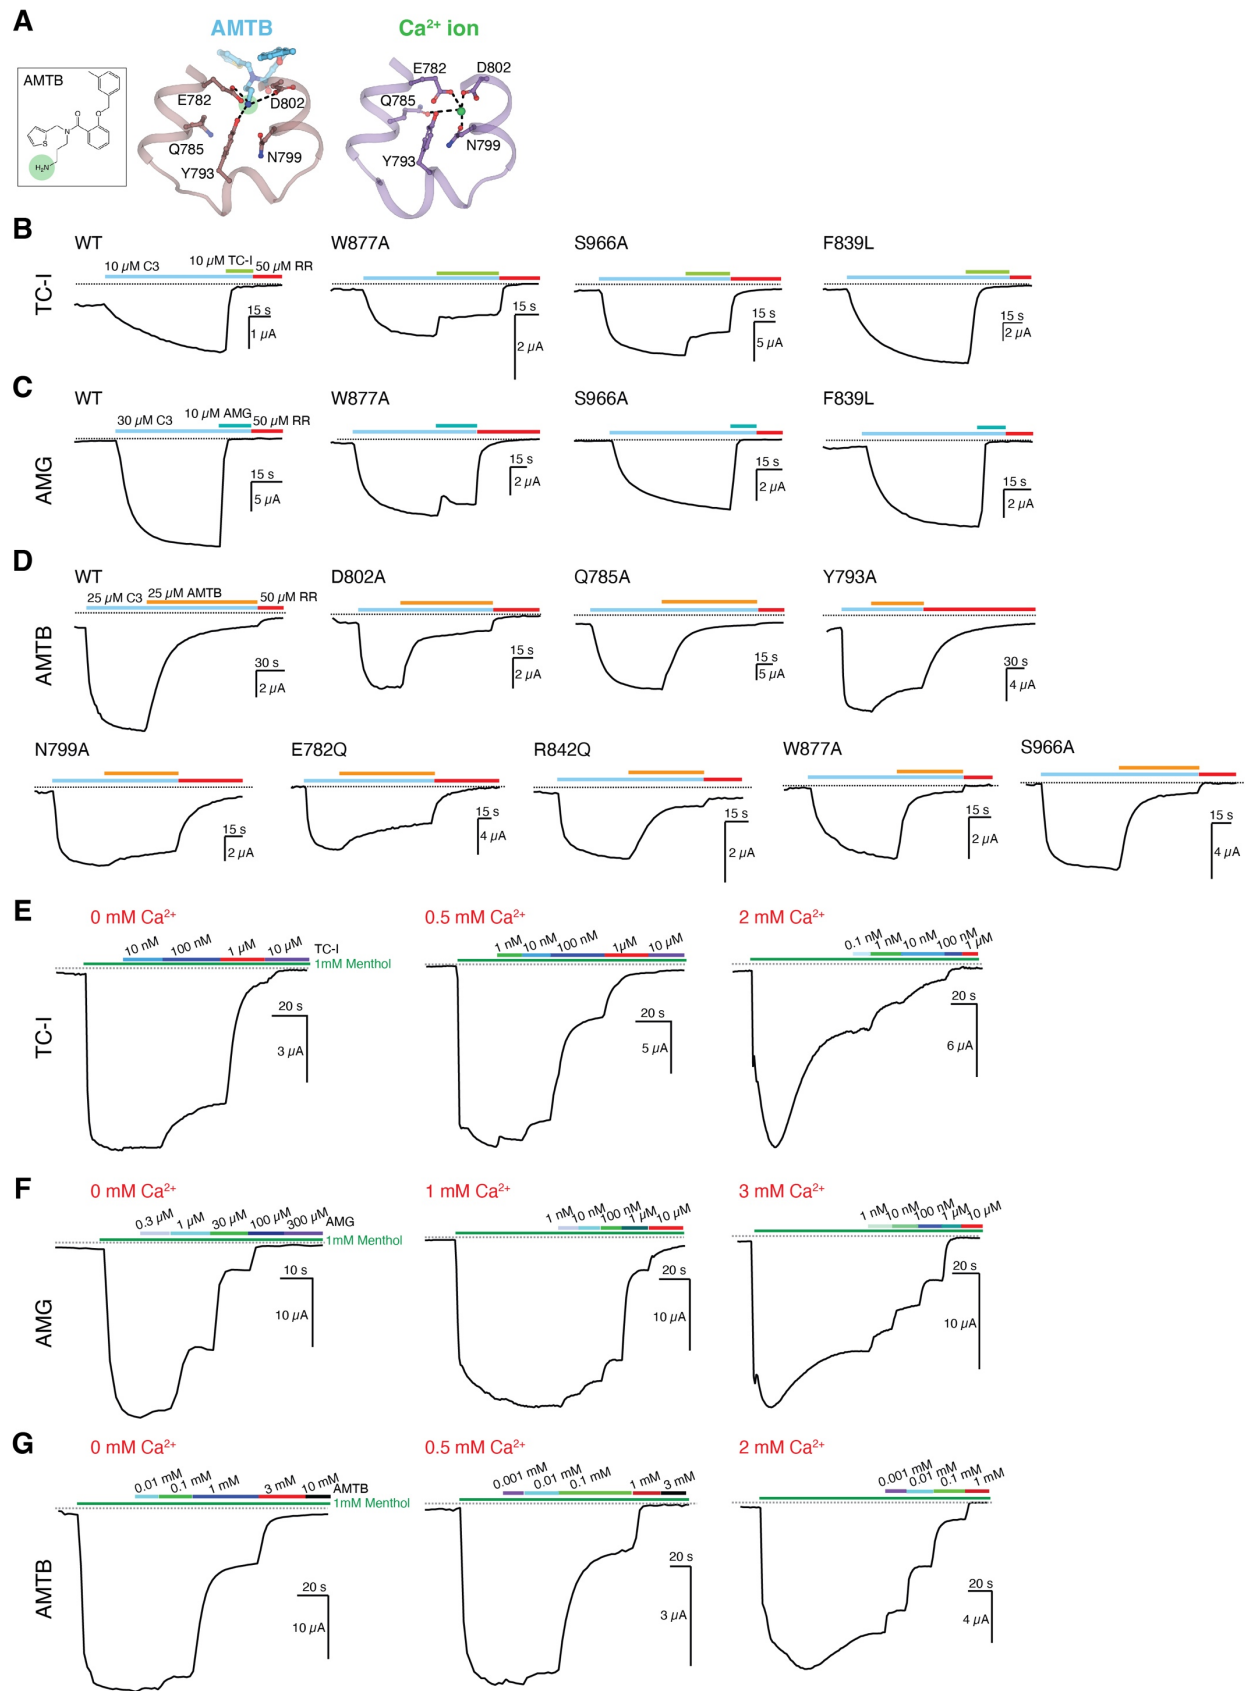

**Fig. S6. Functional characterizations of antagonists on TRPM8<sub>MM</sub> channels.**

(A) Comparison between the AMTB amine group interaction (left) and the  $\text{Ca}^{2+}$  ion coordination (right, PDB 8E4L) in the VSLD cavity.

(B to D) Representative TEVC recordings on the WT and mutant TRPM8<sub>MM</sub> channels at  $-60\text{mV}$ . Horizontal colored lines represent the application of C3 (blue), TC-I (B, lime), AMG (C, teal), AMTB (D, orange), and ruthenium red (RR) as indicated.

(E to G) Representative TEVC recordings of WT TRPM8<sub>MM</sub> at  $-60\text{ mV}$ . Horizontal colored lines indicated applications of 1 mM menthol followed by increasing concentrations of TC-I (E), AMG (F), and AMTB (G) in the presence of zero (left panels), low (middle panels), and high (right panels) concentrations of extracellular  $\text{Ca}^{2+}$  as indicated in the figures.

Dotted lines in B to G indicate the zero-current level.

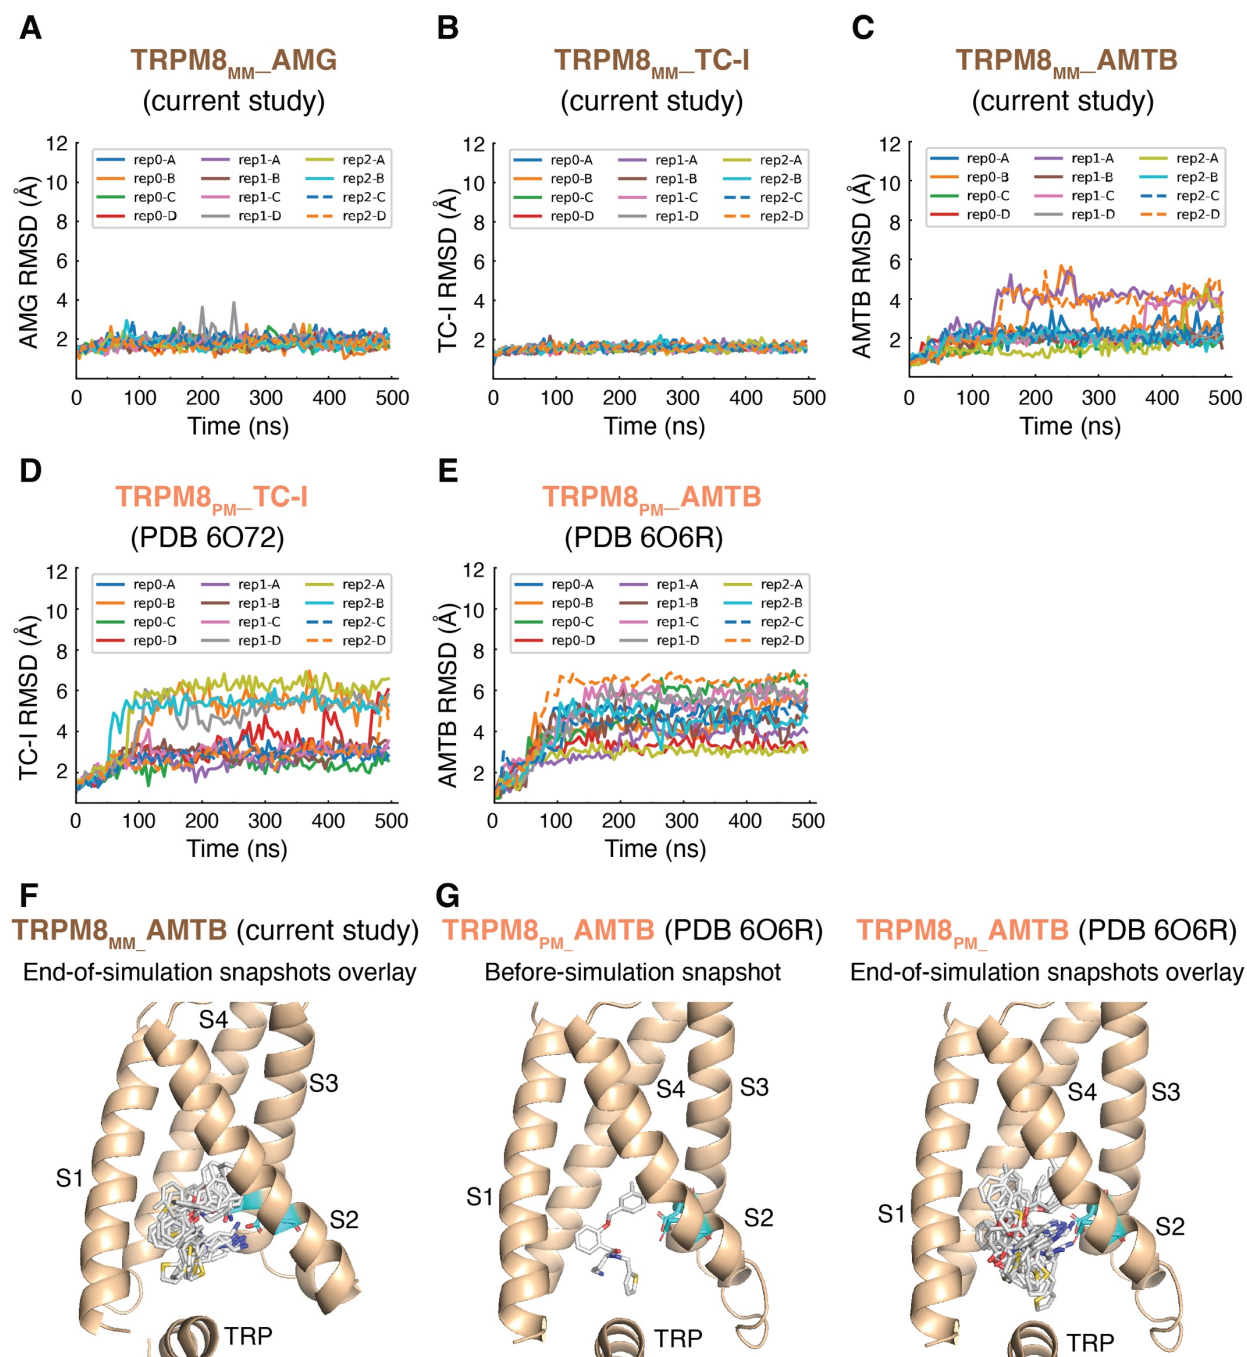

**Fig. S7. Molecular dynamics (MD) simulations of antagonist binding to TRPM8<sub>MM</sub> and TRPM8<sub>PM</sub> channels.**

(A to C) Ligand RMSD of AMG (A), TC-I (B), and AMTB (C) in the TRPM8<sub>MM</sub> structures from the current study, during the simulation time course of each replicate (3 replicas for each assembly) with an averaged RMSD of 1.6 Å for TC-I, 1.8 Å for AMG, and 2.5 Å for AMTB, calculated from the last 200-ns trajectories.

(D and E) Ligand RMSD of TC-I (D; PDB 6072) and AMTB (E; PDB 606R) in the published TRPM8<sub>PM</sub> structures, during the simulation time course of each replicate (3 replicas for each assembly), with an averaged RMSD of 3.7 Å for TC-I and 4.9 Å for AMTB, calculated from the last 200-ns trajectories.

(F) Overlay of the end-of-simulation snapshots of AMTB in the TRPM8<sub>MM</sub>-AMTB structure from the current study.

(G) Comparison of the before-simulation snapshot (left) and the overlaid end-of-simulation snapshots (right) of AMTB in the published TRPM8<sub>PM</sub>-AMTB structure (PDB 606R). AMTB shown as sticks in (F) and (G).

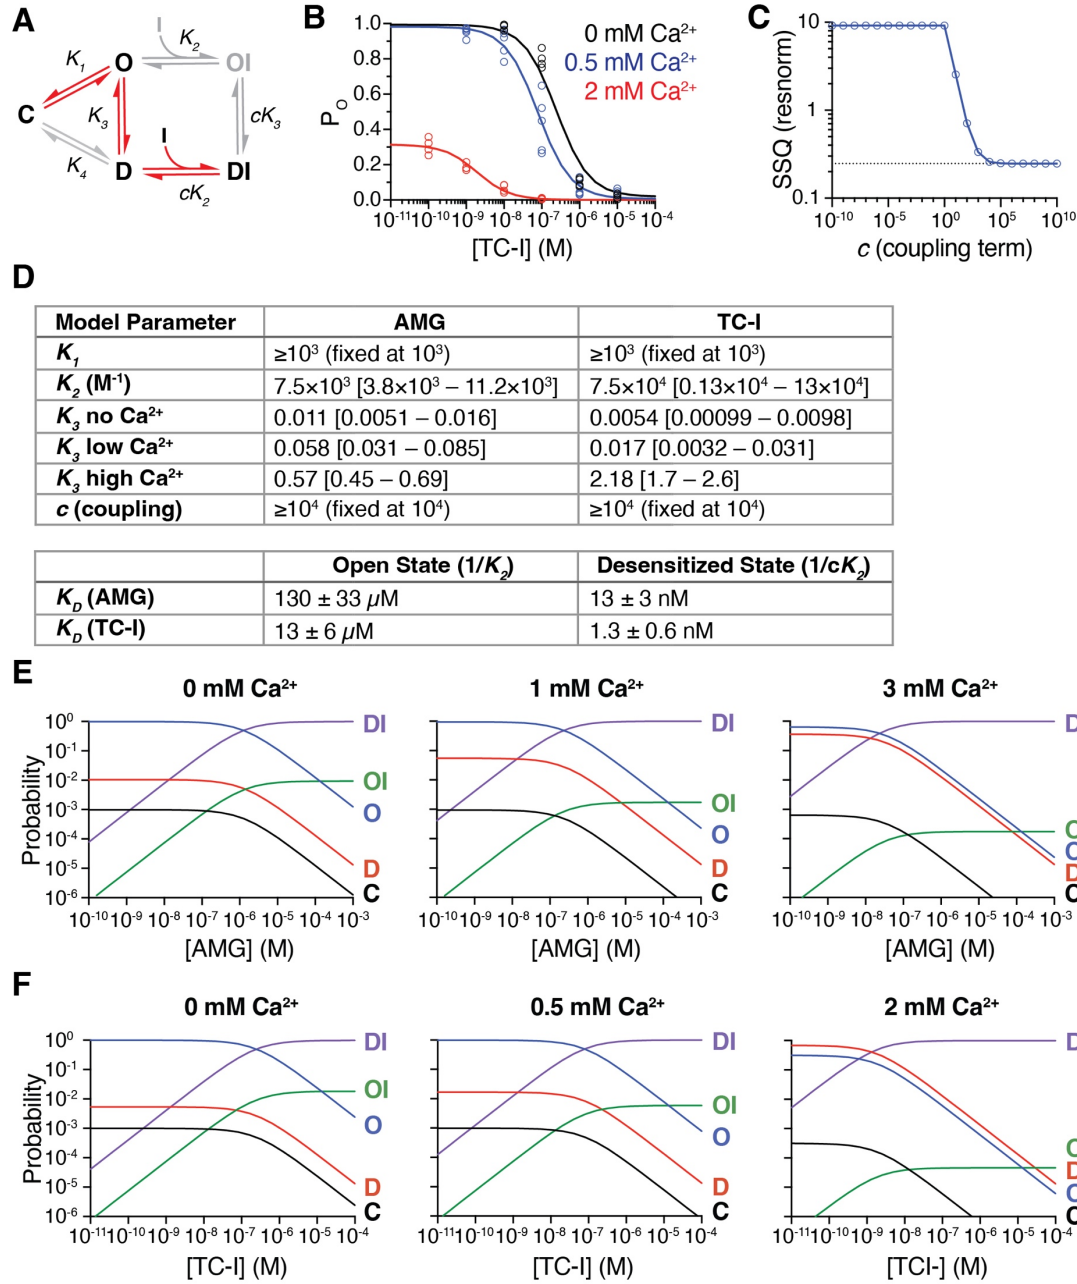

**Fig. S8. Thermodynamic modeling.**

(A) Thermodynamic model of TRPM8 desensitization and inhibitor binding for the equilibria ( $K_n$ ) among closed (C), open (O), desensitized (D), and inhibitor-bound (OI, DI) states and associated thermodynamic coupling ( $c$ ). The red arrows indicate transition among the thermodynamically favored states, based on fit values.

(B) TC-I dose-response data fit with the thermodynamic model for 0 mM, 0.5 mM, and 2 mM extracellular  $Ca^{2+}$ . Data comes from Fig. 2A, taking into account the initial level of desensitization. Datapoints for individual replicate ( $n \geq 4$ ) shown.

(C) Model fit quality as sum of squared residuals (SSQ or resnorm) plotted as a function of fixed coupling parameter ( $c$ ) value.

(D) Model fitting parameters and [95% confidence intervals] for AMG and TC-I data. Calculated  $K_D$  values for inhibitor to O and D states with errors propagated from parameter confidence intervals.

(E) Species populations as a function of AMG concentration based on model fitting parameters in (D). Closed (black), open (blue), desensitized (red), inhibitor-bound open (green), and inhibitor-bound desensitized (purple).

(F) Species populations as a function of TC-I concentration based on model fitting parameters in (D) and colored as in (E).

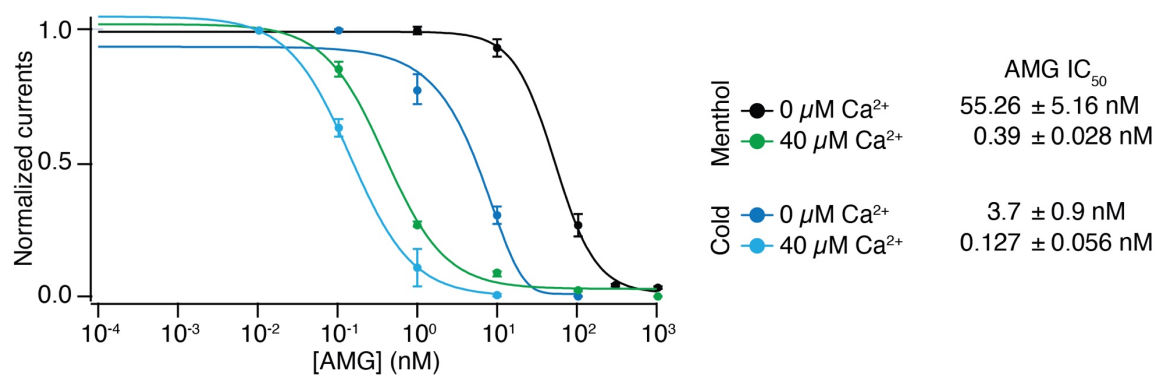

**Fig. S9. Concentration-response relationships for AMG in inhibiting TRPM8<sub>MM</sub> activation by different stimuli.**

Normalized concentration-response relations for AMG against the WT TRPM8<sub>MM</sub> activation by cold or menthol in the presence of 0  $\mu\text{M}$  and 40  $\mu\text{M}$  extracellular  $\text{Ca}^{2+}$  ( $n = 3-4$ ), respectively. Data are mean  $\pm$  SEM. The continuous curves were fit to the Hill equation with  $\text{IC}_{50}$  values indicated in the figure.

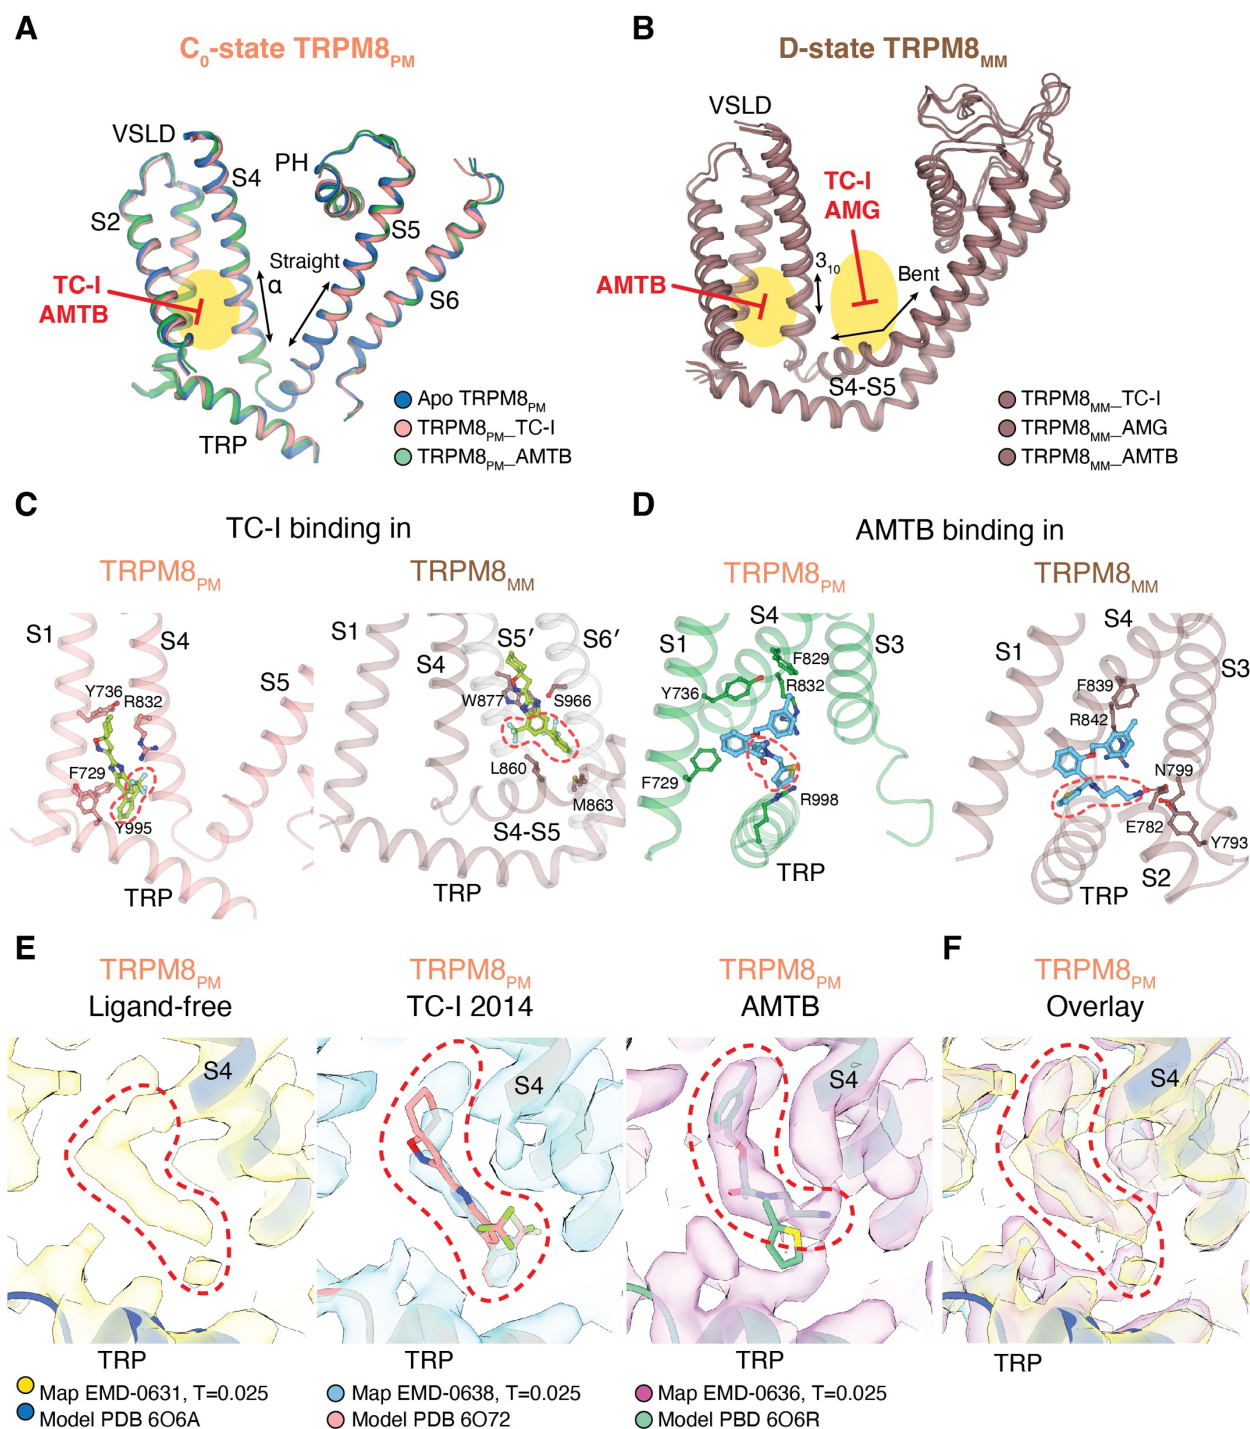

**Fig. S10. Comparison of inhibitor binding in TRPM8<sub>PM</sub> and TRPM8<sub>MM</sub> structures.**

(A) Published TRPM8<sub>PM</sub> structures determined in the ligand-free (apo) and in the presence of TC-I and AMTB, respectively, adopt the C<sub>0</sub>-state conformation. TC-I and AMTB molecules were modeled to bind in the VSLD cavity, as indicated by the yellow shades and red arrows.

(B) TRPM8<sub>MM</sub> structures from the current study determined in the presence of TC-I, AMG, and AMTB, respectively, adopt the D-state conformation. TC-I and AMG bind above the S4-S5 linker and AMTB binds in the VSLD cavity, as indicated by the yellow shades and red arrows.

**(C)** Comparison of TC-I binding in the published TRPM8<sub>PM</sub> structure (left) and in TRPM8<sub>MM</sub> (right). Red dotted circles highlight the different binding poses.

**(D)** Comparison of AMTB binding in the published TRPM8<sub>PM</sub> structure (left) and in TRPM8<sub>MM</sub> (right). Red dotted circles highlight the different binding poses.

**(E)** Superimposition of the PDB model and cryo-EM map for the published TRPM8<sub>PM</sub> structures determined in the ligand-free condition and in the presence of TC-I and AMTB, respectively. Similarly shaped EM density peaks (red dotted lines) are present in the VSLD cavity of all three maps.

**(F)** Superimposition of the three cryo-EM maps from **(E)** with the ligand-free TRPM8<sub>PM</sub> structure, showing similarly shaped EM density peaks (red dotted lines) are present in the VSLD cavity in all three maps.

EMD IDs for cryo-EM maps and PDB IDs for structural models that were previously reported for TRPM8<sub>PM</sub> are indicated in the figure. Key residues and modeled antagonists shown as sticks. Cryo-EM maps shown as colored transparent surface in **(E)** and **(F)**.

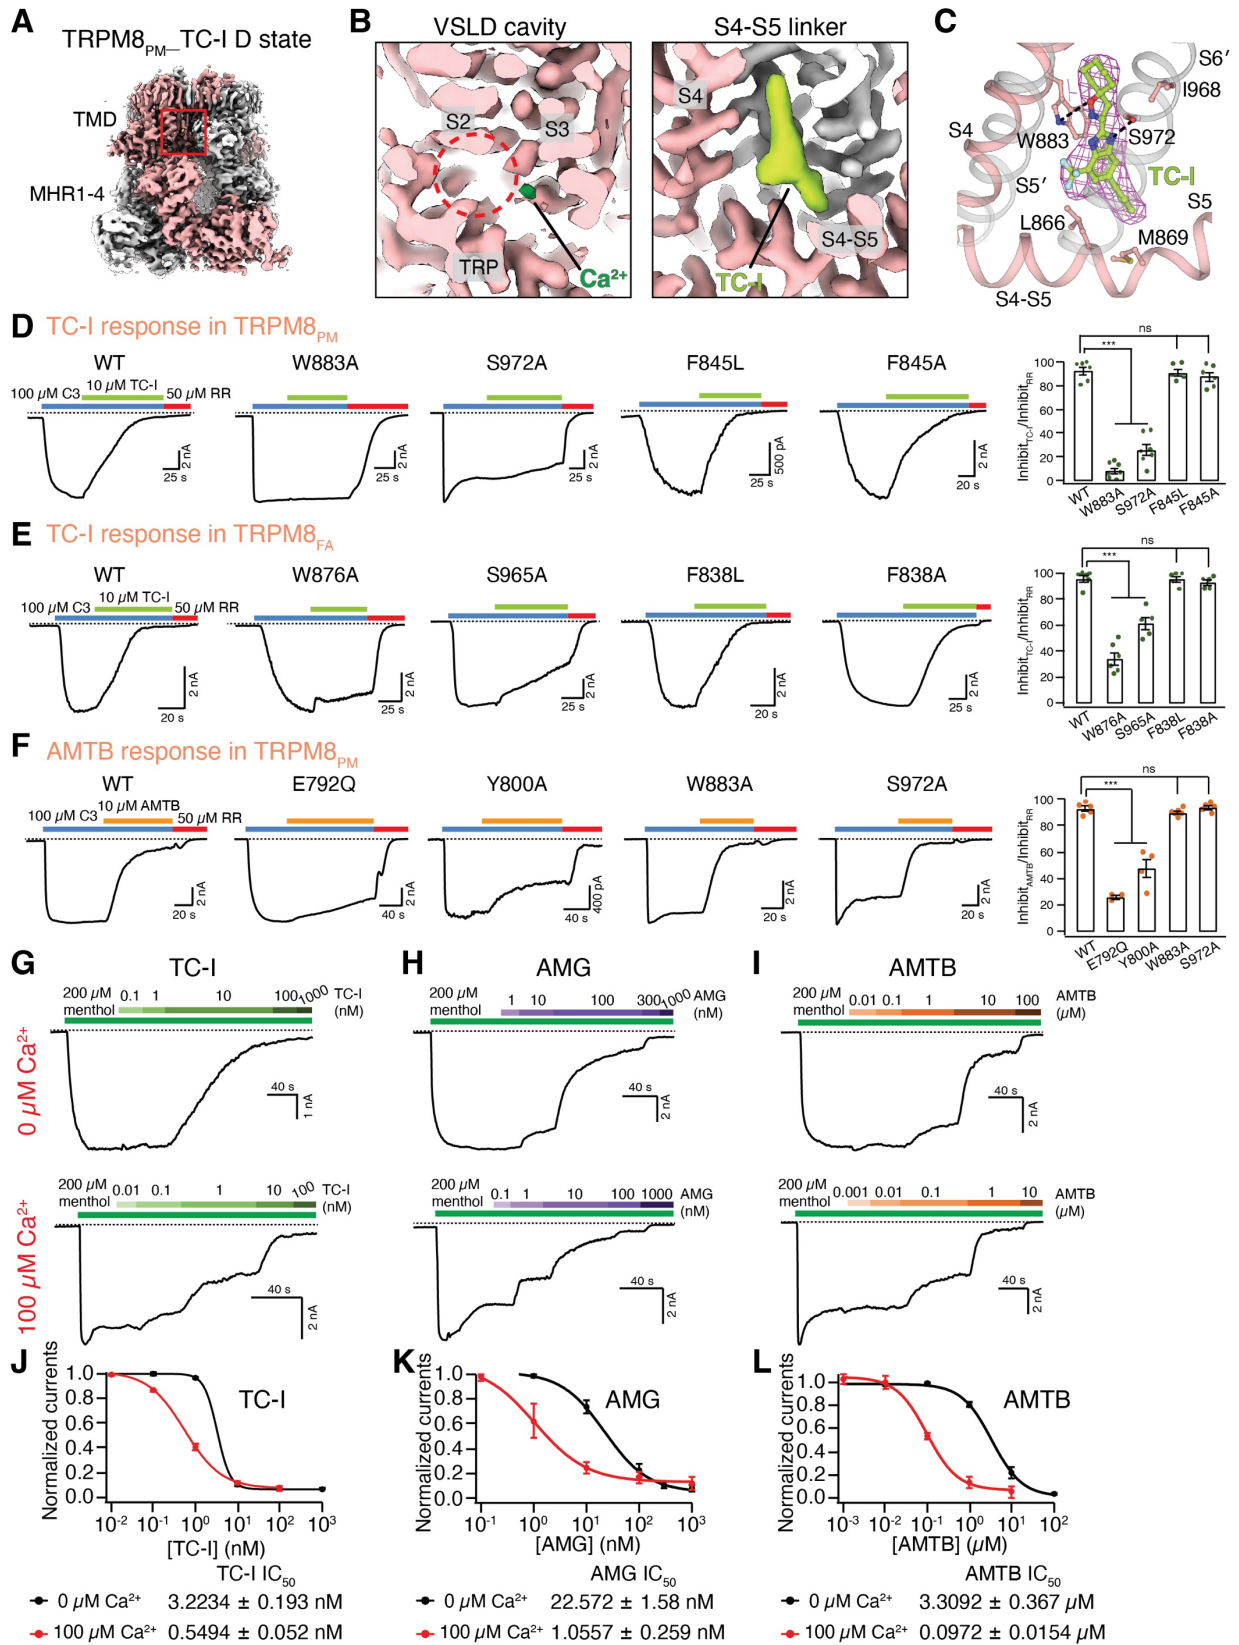

**Fig. S11. Structural and functional validation of antagonist binding in the avian TRPM8<sub>PM</sub> channel from the current study.**

(A) 3D reconstruction of TRPM8<sub>PM</sub> in complex with TC-I and Ca<sup>2+</sup> in the D state conformation. Neighboring protomers are colored in light pink and gray, respectively. Thresholding 0.25.

(B) Close-up views of the EM density at the VSLD cavity (left) and the S4-S5 linker (right) from the reconstruction in (A). Red dashed circle indicates the lack of TC-I density in the VSLD cavity. Densities for Ca<sup>2+</sup> and TC-I colored in green and lime, respectively. Thresholding 0.25 in the left panel and 0.6 in the right panel.

(C) The binding site and EM density for TC-I (lime sticks). Densities (magenta mesh) contoured at thresholding 0.26 for TC-I. Neighboring protomers colored in pink and gray, respectively.

(D) Representative currents of the WT and mutant TRPM8<sub>PM</sub> channels at -60 mV in HEK293T cells. Horizontal colored lines represent the application of 100  $\mu$ M C3 (blue), 10  $\mu$ M TC-I (lime), and ruthenium red (RR) as indicated. Summary of current inhibition by 10  $\mu$ M TC-I in HEK293T cells expressing WT and mutant TRPM8<sub>PM</sub> channels ( $n = 5-7$ ). Dots indicate the individual data points for each experiment. ns > 0.05, \*\*\* $P < 0.001$ , using one-way ANOVA followed by Dunnett post-hoc test. Data are mean  $\pm$  SEM.

(E) Representative currents of the WT and mutant flycatcher TRPM8 (TRPM8<sub>FA</sub>) channels at -60 mV in HEK293T cells. Horizontal colored lines represent the application of 100  $\mu$ M C3 (blue), 10  $\mu$ M TC-I (lime), and RR as indicated. Summary of current inhibition by 10  $\mu$ M TC-I in HEK293T cells expressing WT and mutant TRPM8<sub>FA</sub> channels ( $n = 5-6$ ). Dots indicate the individual data points for each experiment. ns > 0.05, \*\*\* $P < 0.001$ , using one-way ANOVA followed by Dunnett post-hoc test. Data are mean  $\pm$  SEM.

(F) Representative currents of the WT and mutant TRPM8<sub>PM</sub> channels at -60 mV in HEK293T cells. Horizontal colored lines represent the application of 100  $\mu$ M C3 (blue), 10  $\mu$ M AMTB (orange), and RR as indicated. Summary of current inhibition by 10  $\mu$ M AMTB in HEK293T cells expressing WT and mutant TRPM8<sub>PM</sub> channels ( $n = 3-6$ ). Dots indicate the individual data points for each experiment. ns > 0.05, \*\*\* $P < 0.001$ , using one-way ANOVA followed by Dunnett post-hoc test. Data are mean  $\pm$  SEM.

(G to I) Representative current traces of the WT TRPM8<sub>PM</sub> channels at -60 mV in HEK293T cells. Current trace elicited by 200  $\mu$ M menthol was inhibited by increasing concentrations of TC-I (G), AMG (H), and AMTB (I) in the presence of 0  $\mu$ M (top) or 100  $\mu$ M (bottom) extracellular Ca<sup>2+</sup>.

(J to L) Normalized concentration-response relations for TC-I (J), AMG (K), and AMTB (L) against the WT TRPM8<sub>PM</sub> activation by 200  $\mu$ M menthol in the presence of 0  $\mu$ M (black trace,  $n = 4-5$ ) or 100  $\mu$ M (red trace,  $n = 4$ ) extracellular Ca<sup>2+</sup>. Data are mean  $\pm$  SEM. The continuous curves were fit to the Hill equation with IC<sub>50</sub> values indicated in the figure.

Dotted lines in D to I indicate the zero-current level.

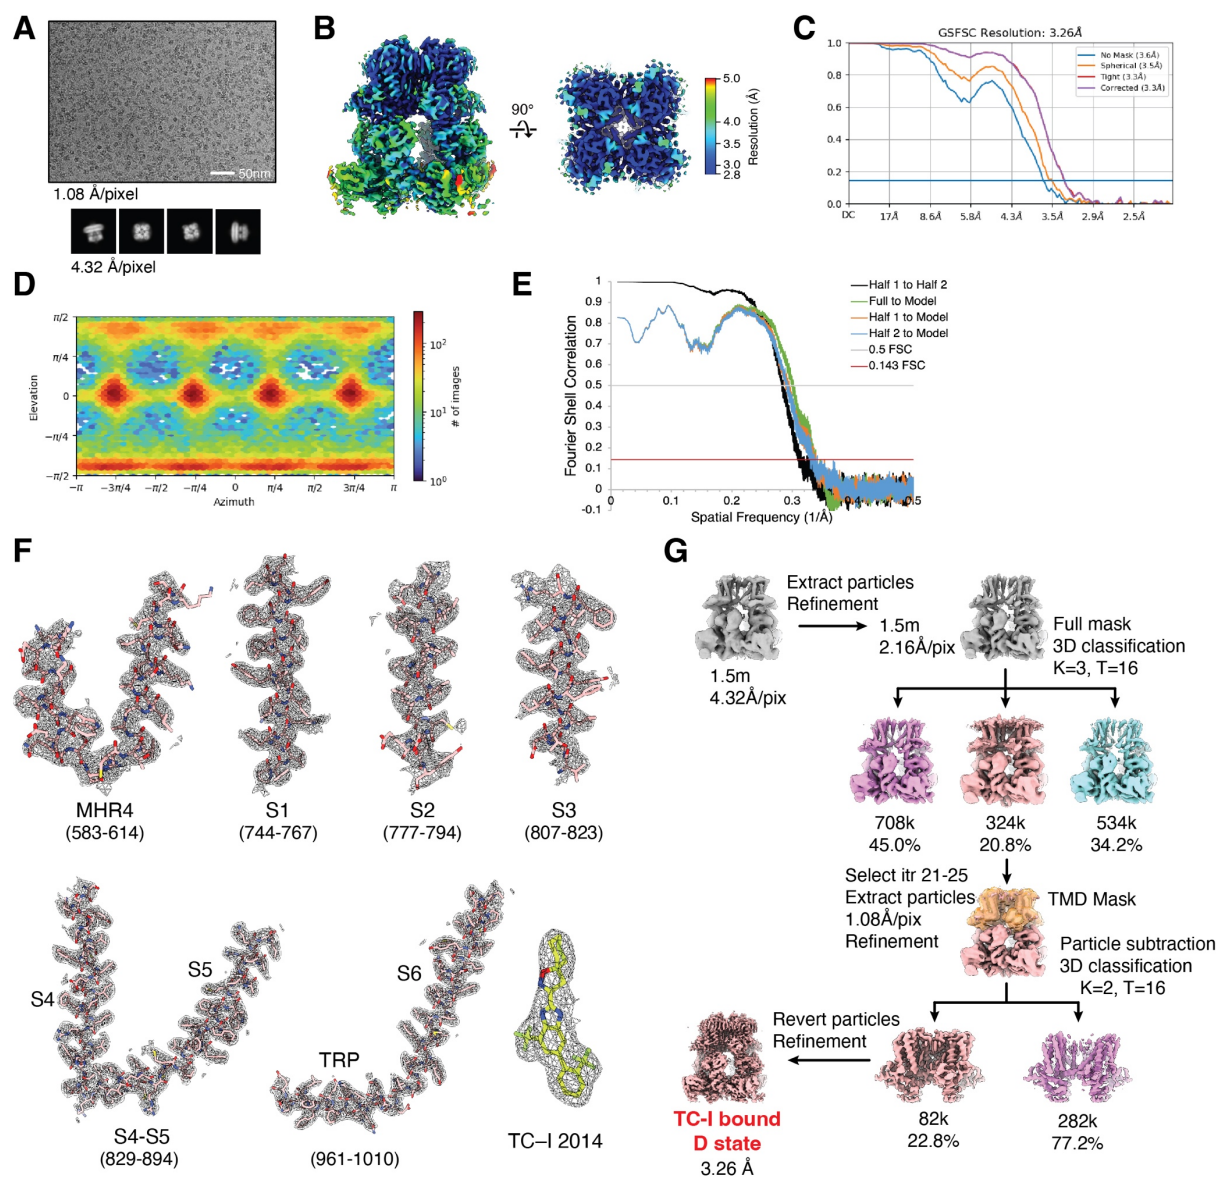

**Fig. S12. Cryo-EM data processing and validation, part II, for the TRPM8<sub>PM</sub>-TC-I structure in the current study.**

(A) Representative micrographs and 2D classification images. The pixel sizes are specified below the images.

(B) Local resolution estimation.

(C) The Fourier shell correlation (FSC) curves of the final 3D reconstruction with different masking calculated in CryoSPARC,

(D) Orientation distribution diagram.

(E) the FSC curves between model and full- or half-maps calculated in PHENIX.

(F) Representative EM densities (gray mesh) for key structural elements and TC-I. Thresholding 0.25.

(G) Cryo-EM 3D classification workflow to dissect the TC-I bound reconstruction for the TRPM8<sub>PM</sub> channel. TMD mask used for particle subtraction and 3D classification jobs in RELION shown in transparent orange color.

|                  |                                                                |              |           |
|------------------|----------------------------------------------------------------|--------------|-----------|
|                  |                                                                | <b>S1</b>    |           |
| Human_TRPM8      | CLFIIPLVGCGFVSFRKKPVDKHKLLWYYVAFFTSPPVVFSSWNVFYIAFLLLFAYVLL    |              | 757       |
| Mouse_TRPM8      | CLFIIPLVGCGLVSFRRKPIDKHKLLWYYVAFFTSPPVVFSSWNVFYIAFLLLFAYVLL    |              | 757       |
| Rat_TRPM8        | CLFIIPLVGCGLVSFRRKPIDKHKLLWYYVAFFTSPPVVFSSWNVFYIAFLLLFAYVLL    |              | 757       |
| Chicken_TRPM8    | CLFFFPLIGCGFISFRKKPVEKSKKFLYYVSFFTSPPVVFSSWNVFYIAFLLLFAYVLL    |              | 757       |
| Flycatcher_TRPM8 | CLFFFPLIGCGFISFRKKPVEKTKKFLYYVSFFTSPPVVFSSWNVFYIAFLLLFAYVLL    |              | 780       |
| Great_tit_TRPM8  | CLFFFPLIGCGFISFRKKPVEKSKKFLYYVSFFTSPPVVFSSWNVFYIAFLLLFAYVLL    |              | 767       |
|                  | ***:***:***:*****:* ***: ***:*****:***:*****                   |              |           |
|                  | <b>S2</b>                                                      | <b>S2-S3</b> | <b>S3</b> |
| Human_TRPM8      | MDFHSPHPPELVLYSLVFLFCDEVQRQWYVNGVNYFTDLWNVMDTLGLFYFIAGIVFRL    |              | 817       |
| Mouse_TRPM8      | MDFHSPHTPELILYALVFLFCDEVQRQWYVNGVNYFTDLWNVMDTLGLFYFIAGIVFRL    |              | 817       |
| Rat_TRPM8        | MDFHSPHTPELILYALVFLFCDEVQRQWYVNGVNYFTDLWNVMDTLGLFYFIAGIVFRL    |              | 817       |
| Chicken_TRPM8    | MDFQKEPTVLEIILYVLVFIILCDEVQRQWYVNGSKYLSDLWNVMDTLAIFYFIAGIVLRL  |              | 817       |
| Flycatcher_TRPM8 | MDFQKEPTALEIILYVLVFIILCDEVQRQWYVNGSKYFSDLWNVMDTLAIFYFIAGIVFRL  |              | 840       |
| Great_tit_TRPM8  | MDFQKEPTALEIILYVLVFLLCDE---WYVNGSKYFSDLWNVMDTLAIFYFIAGIVFRL    |              | 824       |
|                  | ***:. * *:*** ***:*** ***:** *:***:***:*****:*****:***         |              |           |
|                  | <b>S4</b>                                                      | <b>S4-S5</b> | <b>S5</b> |
| Human_TRPM8      | HSSNKSSLYSGRVIFCLDYIIFTLRLIHIFTVSRNLGPKIIMLQRMIDVFFFLFLFAVW    |              | 877       |
| Mouse_TRPM8      | HSSNKSSLYSGRVIFCLDYIIFTLRLIHIFTVSRNLGPKIIMLQRMIDVFFFLFLFAVW    |              | 877       |
| Rat_TRPM8        | HSSNKSSLYSGRVIFCLDYIIFTLRLIHIFTVSRNLGPKIIMLQRMIDVFFFLFLFAVW    |              | 877       |
| Chicken_TRPM8    | HSSNESSWYSGRVIFCLDYIVFTLRLIHIFTVSRNLGPKIIMLQRMIDVFFFLFLFAVW    |              | 877       |
| Flycatcher_TRPM8 | HS-DESSWYSGRVIFCLDYIVFTLRLIHIFTVSRNLGPKIIMLQRMIDVFFFLFLFAVW    |              | 899       |
| Great_tit_TRPM8  | HS-DESSWYSGRVIFCLDYIVFTLRLIHIFTVSRNLGPKIIMLQRMIDVFFFLFLFAVW    |              | 883       |
|                  | ** :** *****:*****:*****:*****:*****:*****                     |              |           |
|                  | <b>S5</b>                                                      | <b>PH</b>    |           |
| Human_TRPM8      | MVAFGVARQGILRQNEQRWRWIFRSVIYEPYLA MFQVPSDVGTTDYFAHCTFTGNESK    |              | 937       |
| Mouse_TRPM8      | MVAFGVARQGILRQNEQRWRWIFRSVIYEPYLA MFQVPSDVTSTYDFSHCTFTSGNESK   |              | 937       |
| Rat_TRPM8        | MVAFGVARQGILRQNEQRWRWIFRSVIYEPYLA MFQVPSDVTSTYDFSHCTFTSGNESK   |              | 937       |
| Chicken_TRPM8    | MVAFGVARQGILRKNEHRWEWIFRSVIYEPYLA MFQVPPDDVGTTFYDFRCTFTSGNESK  |              | 937       |
| Flycatcher_TRPM8 | MVAFGVARQGILRKNEHRWEWIFRSVIYEPYLA MFQVPPDDIDGTTYNFDHCTFTSGNESK |              | 959       |
| Great_tit_TRPM8  | MVAFGVARQGILRKNEHRWEWIFRSVIYEPYLA MFQVPPDDIDGTTYNFDHCTFTSGNESK |              | 943       |
|                  | *****:***:***:*****:*****:*****:*****:*****:*****              |              |           |
|                  | <b>S6</b>                                                      | <b>TRP</b>   |           |
| Human_TRPM8      | PLCVELDEHNLPRFPEWITIPLVCIYMLSTNILLVNLVAMFGYTVGTQENNDQVWK FQ    |              | 997       |
| Mouse_TRPM8      | PLCVELDEHNLPRFPEWITIPLVCIYMLSTNILLVNLVAMFGYTVGTQENNDQVWK FQ    |              | 997       |
| Rat_TRPM8        | PLCVELDEYNLPRFPEWITIPLVCIYMLSTNILLVNLVAMFGYTVGTQENNDQVWK FQ    |              | 997       |
| Chicken_TRPM8    | PLCVELDANNQPRFPEWITIPLVCIYMLSTNILLVNLVAMFGYTVGSVQENNDQVWK FQ   |              | 997       |
| Flycatcher_TRPM8 | PLCVELDANNQPRFPEWITIPLVCIYMLSTNILLVNLVAMFGYTVGSVQENNDQVWK FQ   |              | 1019      |
| Great_tit_TRPM8  | PLCVELDANNQPRFPEWITIPLVCIYMLSTNILLVNLVAMFGYTVGSVQENNDQVWK FQ   |              | 1003      |
|                  | ***** * *****:*****:*****:*****:*****:*****                    |              |           |
|                  | <b>TRP</b>                                                     |              |           |
| Human_TRPM8      | RYFLVQEYCSRLNIPFPFVIFAYFYMVVKCKFKCCCKEKNMESSVCCFKNEDNETLAWEG   |              | 1057      |
| Mouse_TRPM8      | RYFLVQEYCNRLNIPFPFVVFAYFYMVVKCKFKCCCKEKNMESNACFRNEDNETLAWEG    |              | 1057      |
| Rat_TRPM8        | RYFLVQEYCNRLNIPFPFVVFAYFYMVVKCKFKCCCKEKNTESSACFRNEDNETLAWEG    |              | 1057      |
| Chicken_TRPM8    | RYFLVQEYCSRLTIPFPFVIFAYIFMVMRKCFKCCCKNESKEPSICCSRNEDNETLSWEA   |              | 1057      |
| Flycatcher_TRPM8 | RFFLVQEYCSRLTIPFPFVIFAYIFMVMRKCFKCCCKNESKEPSVCCSRNEDNEILAWEA   |              | 1079      |
| Great_tit_TRPM8  | RFFLVQEYCSRLTIPFPFVIFAYIFMVMRKCFKCCCKNESKEPSICCSRNEDNEILAWEA   |              | 1063      |
|                  | *:*****.***:*****:***:***:*****:***:*****:***:*****            |              |           |

**Fig. S13. Sequence alignment at the transmembrane domain among TRPM8 orthologs.**

Residues covering the transmembrane helices S1 to S6 and the TRP domain are shown. Secondary structures based on the O and D states of mouse TRPM8 (TRPM8<sub>MM</sub>) structures are indicated by rectangles and colored as in **fig. S1**. Sequence alignment was generated by the Clustal Omega program. Residue conservation is annotated by asterisks (\*) for full conservation, colons (:) for strong similarity, and dots (.) for weak similarity. Residues involved in TC-I/AMG binding at the intersubunit interface above the S4-S5 linker are colored in green, while those for AMTB binding in the VSLD cavity in blue.

Sequence accession numbers – human TRPM8: UniProt Q7Z2W7; mouse TRPM8 (TRPM8<sub>MM</sub>): UniProt Q8R4D5; rat TRPM8: UniProt Q8R455; chicken TRPM8: NCBI NP\_001007083.2; collared flycatcher TRPM8 (TRPM8<sub>FA</sub>): UniProt U3JD03; great tit TRPM8 (TRPM8<sub>PM</sub>): NCBI XP\_015489531.1.

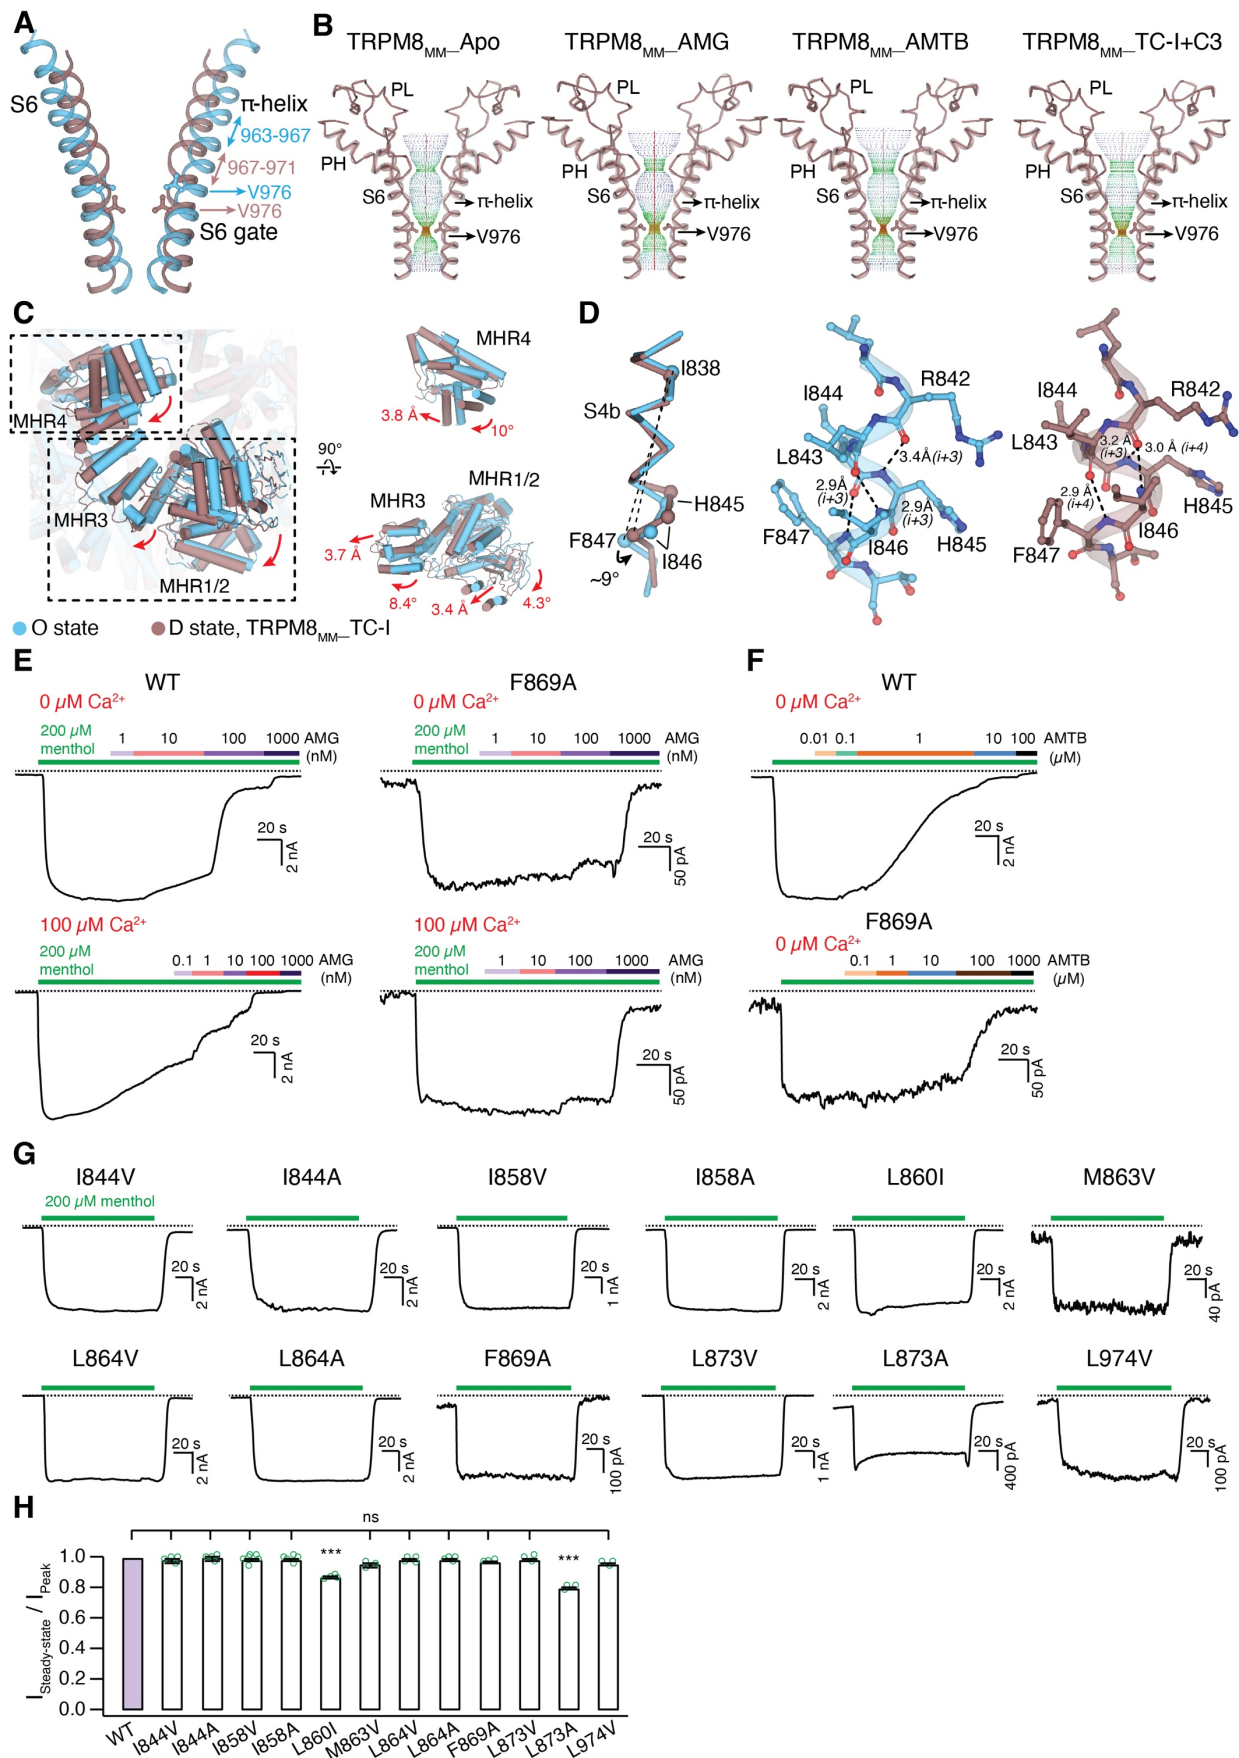

**Fig. S14. Mechanisms of TRPM8 desensitization and inhibition.**

(A) Close-up comparison of S6 movement from O (blue) to D (brown) state, showing position changes in the S6 gate (Val<sup>976</sup> in sticks) and the  $\pi$ -helix (two-headed arrows).

(B) Ion permeation pathway calculated from the HOLE diagram. The positions for the S6 gate residue and  $\pi$ -helix are denoted.

(C) Overlay (left) of the cytoplasmic MHR1 to 4 domains between the O state (blue) and the D state TRPM8<sub>MM</sub>\_TC-I (brown). Insets (right) showing close-up views at the dashed boxes from the left panel. Channel structures shown as cartoon cylinders. Red arrows indicate movements from O to D state with distances and angles denoted.

(D) Superimposed (left) and side-by-side (middle and right) comparison of the S4b helical configuration between the O (blue) and the D (brown) states. Arrows indicate rearrangement in S4b. Dashed lines indicate the hydrogen bonds in the helical backbones.

(E) Representative currents of the WT (left) and Phe<sup>869</sup>Ala (right) TRPM8<sub>MM</sub> channels at –60 mV in HEK293T cells. Current traces elicited by 200  $\mu$ M menthol was inhibited by increasing concentrations of AMG in the presence of 0  $\mu$ M (top) and 100  $\mu$ M (bottom) extracellular Ca<sup>2+</sup>.

(F) Representative currents of the WT (top) and Phe<sup>869</sup>Ala (bottom) TRPM8<sub>MM</sub> channels at –60 mV in HEK293T cells. Current traces elicited by 200  $\mu$ M menthol was inhibited by increasing concentrations of AMTB.

(G) Representative currents of the mutant TRPM8<sub>MM</sub> channels at –60 mV in HEK293T cells. Current traces elicited by 200  $\mu$ M menthol for 2 min.

(H) Summary of currents remained after desensitization for the WT and mutant TRPM8<sub>MM</sub> channels activated by menthol ( $n = 3-6$ ). Summary data of the WT (purple bar) from **Fig. 4K** is reproduced to facilitate visual comparison. Open circles indicate the individual data points for each experiment. ns > 0.05, \*\*\* $P < 0.001$ , using one-way ANOVA followed by Dunnett post-hoc test. Data are mean  $\pm$  SEM.

Dotted lines in **E** to **G** indicate the zero-current level.

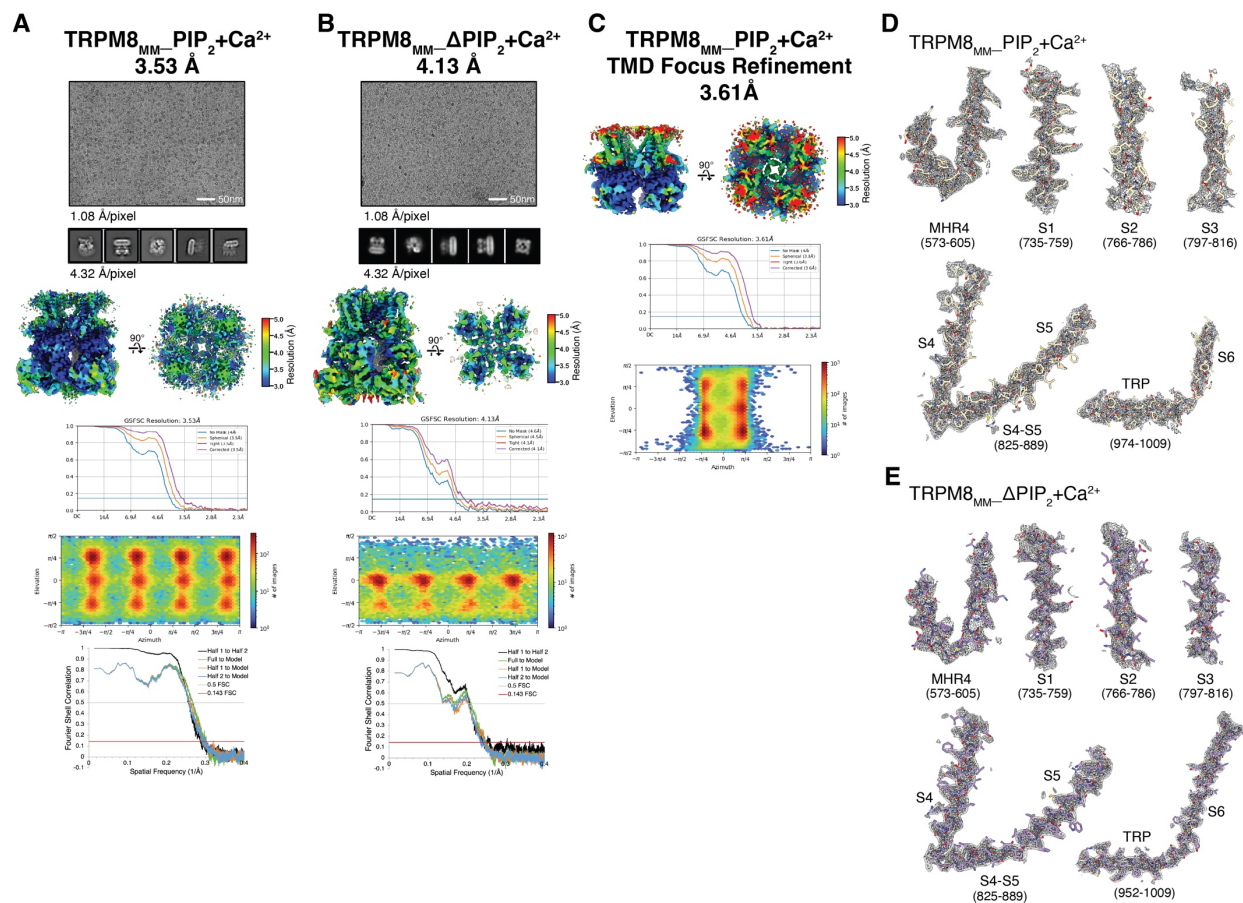

**Fig. S15. Cryo-EM data collection and validation, part III.**

(A and B) Representative micrographs, 2D classification images, local resolution estimation, the Fourier shell correlation (FSC) curves of the final 3D reconstruction with different masking calculated in CryoSPARC, orientation distribution diagram, and the FSC curves between model and full- or half-maps calculated in PHENIX. Results are shown for TRPM8<sub>MM</sub>\_PIP<sub>2</sub>+Ca<sup>2+</sup> (A) and TRPM8<sub>MM</sub>\_ΔPIP<sub>2</sub>+Ca<sup>2+</sup> (B), respectively. The pixel sizes are specified below the images.

(C) Local resolution estimation, the Fourier shell correlation (FSC) curves of the final 3D reconstruction with different masking calculated in CryoSPARC, and orientation distribution diagram for the TMD focused refinement on TRPM8<sub>MM</sub>\_PIP<sub>2</sub>+Ca<sup>2+</sup>.

(D and E) Representative EM densities (gray mesh) for key structural elements in TRPM8<sub>MM</sub>\_PIP<sub>2</sub>+Ca<sup>2+</sup> (D), TRPM8<sub>MM</sub>\_ΔPIP<sub>2</sub>+Ca<sup>2+</sup> (E). Thresholding at 0.15 in (D), 0.18 or 0.2 in (E).

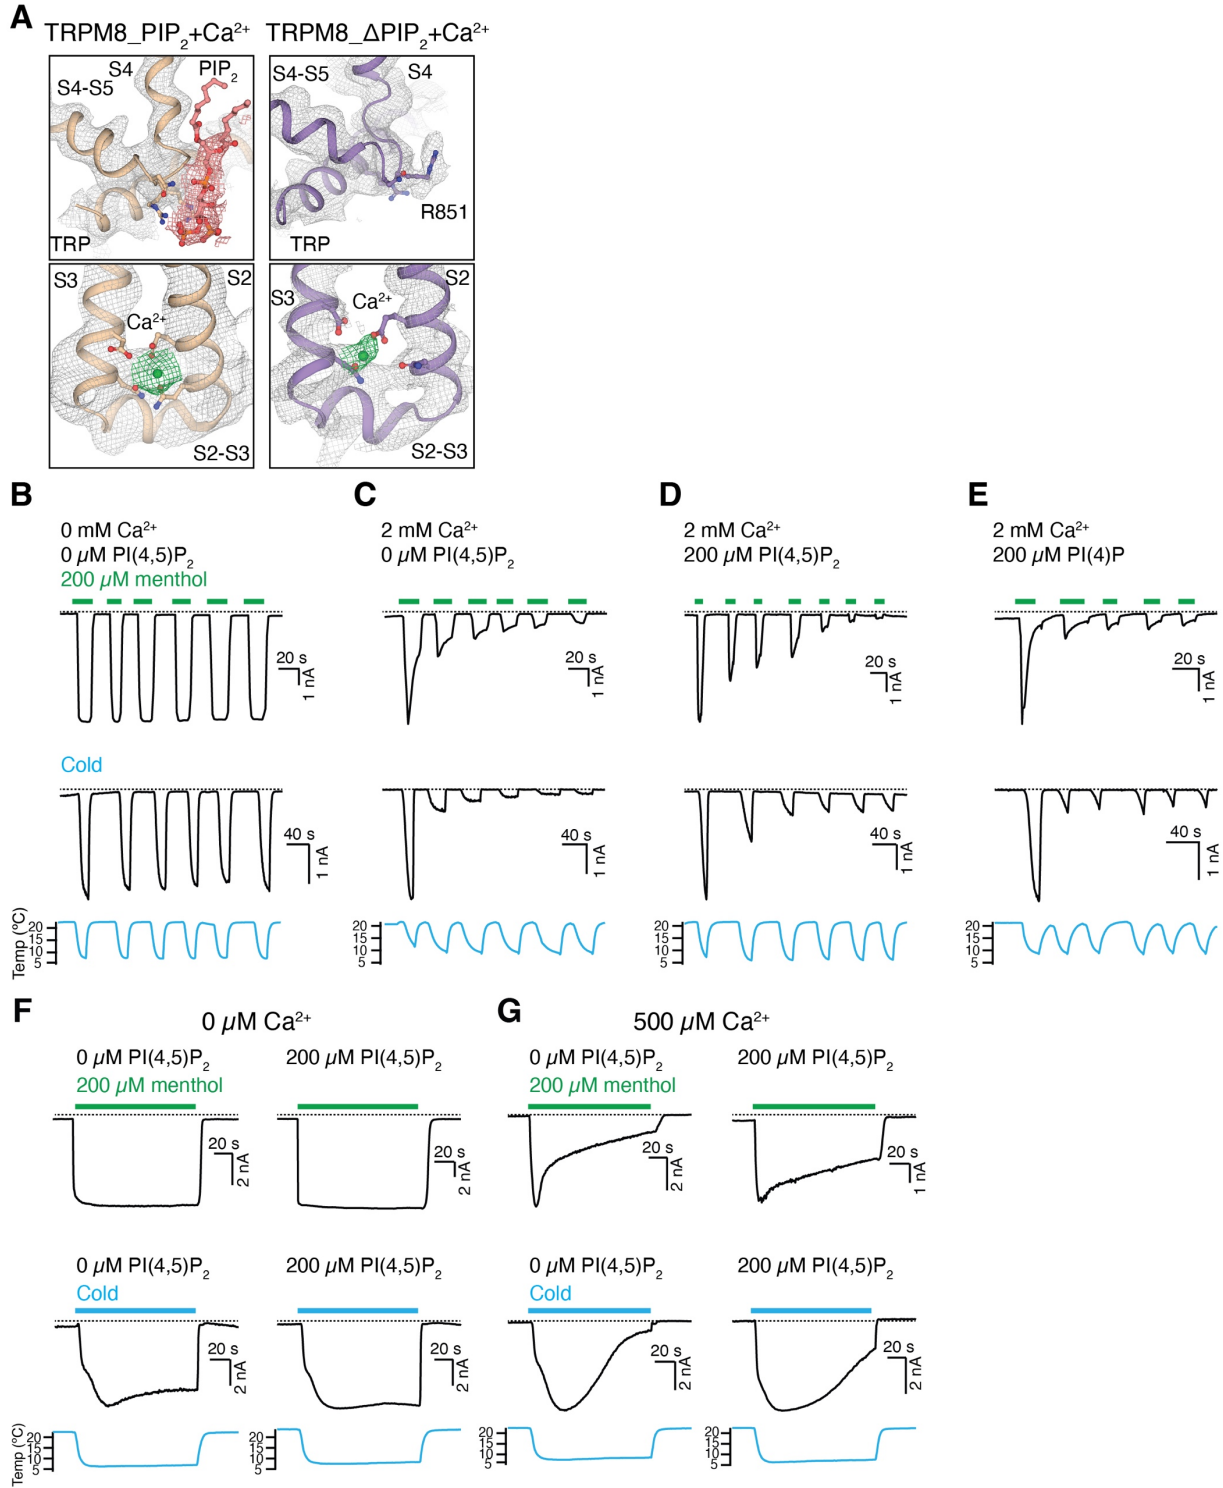

**Fig. S16. The roles of PIP<sub>2</sub> and Ca<sup>2+</sup> in TRPM8 desensitization.**

(A) EM densities at the interfacial cavity (top) and the VSLD cavity (bottom) in TRPM8<sub>MM</sub>\_PIP<sub>2</sub>+Ca<sup>2+</sup> (left, wheat) and TRPM8<sub>MM</sub>\_ΔPIP<sub>2</sub>+Ca<sup>2+</sup> (right, purple) structures. Densities are contoured at 0.15 and 0.2 for channel (gray mesh), 0.13 for PIP<sub>2</sub> (red mesh), 0.14 for Ca<sup>2+</sup> (green mesh) in TRPM8<sub>MM</sub>\_PIP<sub>2</sub>+Ca<sup>2+</sup>, and contoured at 0.19 and 0.2 for channel (gray mesh) and 0.2 for Ca<sup>2+</sup> (green mesh) in TRPM8<sub>MM</sub>\_ΔPIP<sub>2</sub>+Ca<sup>2+</sup>.

**(B to E)** Representative time courses of TRPM8<sub>MM</sub> activation at  $-60$  mV in HEK293T cells. Current traces elicited by  $200\text{ }\mu\text{M}$  menthol (top) or cold (bottom) in the presence of  $0\text{ mM}$  extracellular  $\text{Ca}^{2+}$  and  $0\text{ }\mu\text{M}$  diC8-PI(4,5)P<sub>2</sub> in the intracellular pipette solution (**B**),  $2\text{ mM}$  extracellular  $\text{Ca}^{2+}$  and  $0\text{ }\mu\text{M}$  diC8-PI(4,5)P<sub>2</sub> in the intracellular pipette solution (**C**),  $2\text{ mM}$  extracellular  $\text{Ca}^{2+}$  and  $200\text{ }\mu\text{M}$  diC8-PI(4,5)P<sub>2</sub> in the intracellular pipette solution (**D**),  $2\text{ mM}$  extracellular  $\text{Ca}^{2+}$  and  $200\text{ }\mu\text{M}$  diC8-PI(4)P in the intracellular pipette solution (**E**).

**(F and G)** Representative currents of the WT TRPM8<sub>MM</sub> channels at  $-60$  mV in HEK293T cells. Current trace elicited by  $200\text{ }\mu\text{M}$  menthol (top) or cold (bottom) for  $2\text{ min}$  in the presence of  $0\text{ }\mu\text{M}$  (**F**) or  $500\text{ }\mu\text{M}$  (**G**) extracellular  $\text{Ca}^{2+}$ . Currents were recorded without (left) or with (right)  $200\text{ }\mu\text{M}$  diC8-PI(4,5)P<sub>2</sub> in the intracellular pipette solution.

Dotted lines in **B** to **G** indicate the zero-current level.

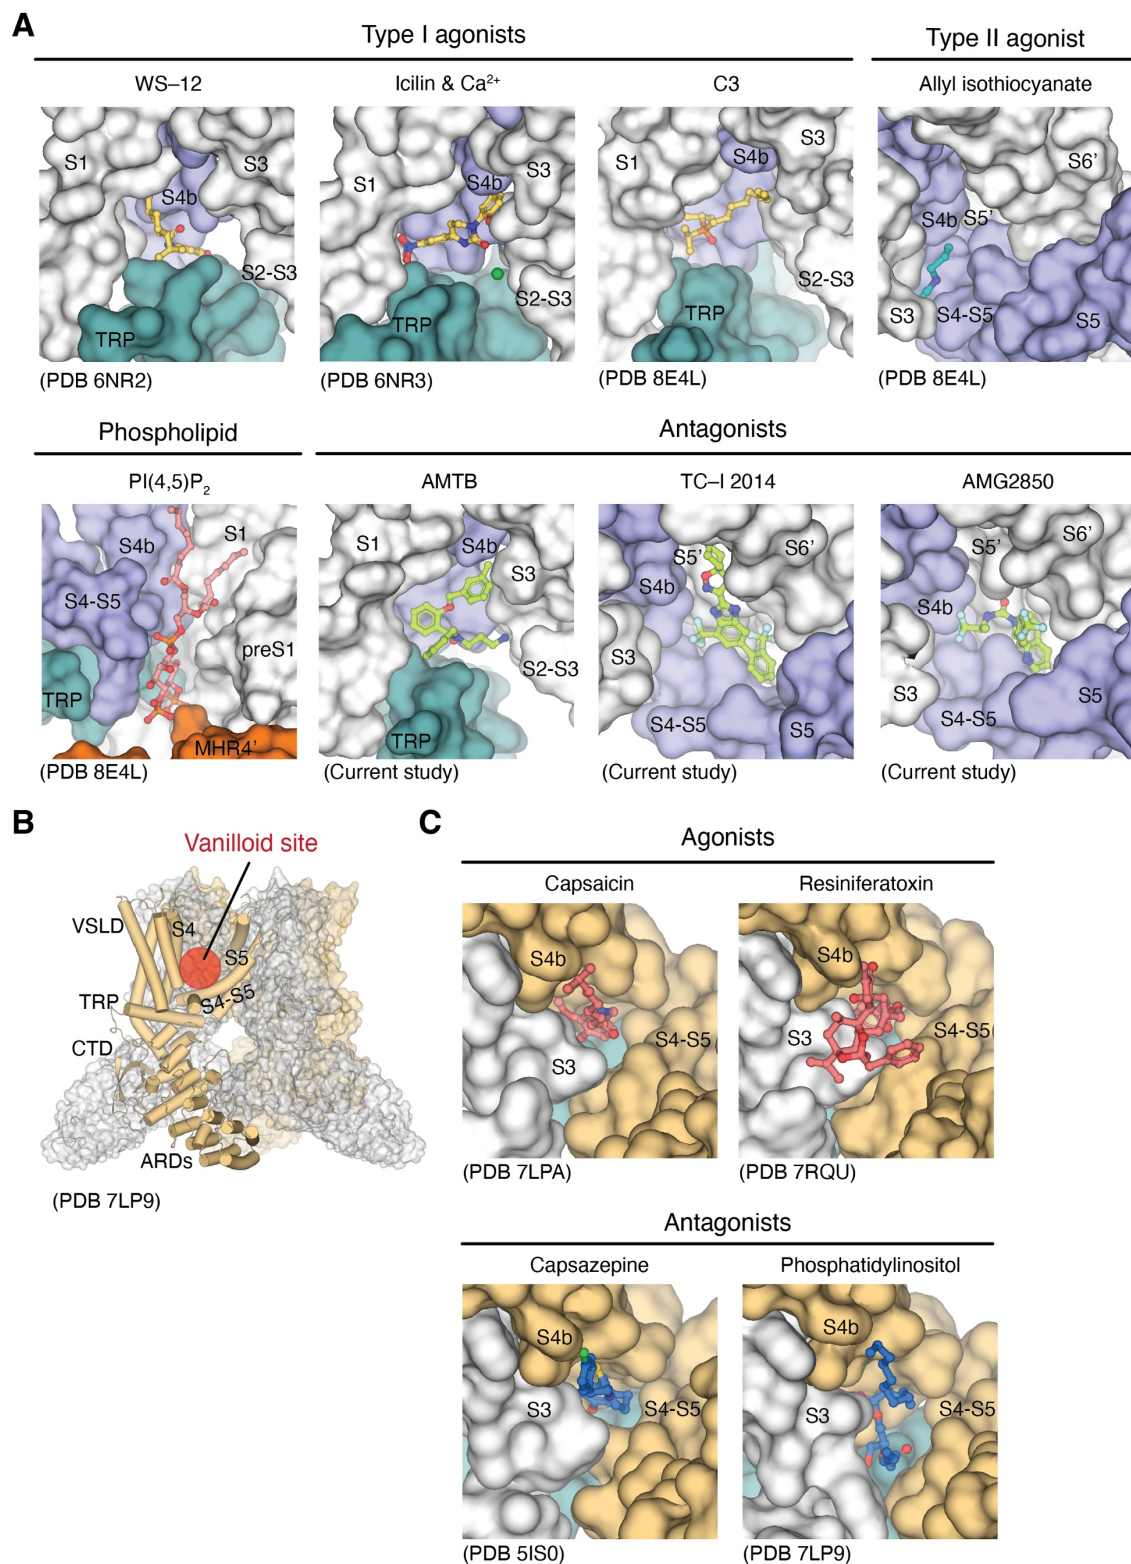

**Fig. S17. Comparison of ligand binding to TRPM8 and TRPV1 channels.**

(A) Binding sites for type I agonists (WS-12, icilin, C3), type II agonists (AITC), PI(4,5)P<sub>2</sub>, and antagonists (AMTB, TC-I, AMG) in TRPM8 channels.

(B) Architecture of TRPV1 channels and the vanilloid binding site.

(C) Binding sites for agonists (capsaicin, resiniferatoxin) and antagonists (capsazepine, phosphatidylinositol) in TRPV1 channels.

Ligand binding sites are shown in surfaces and ligand molecules in sticks. PDB IDs are specified.

**Table S1. Cryo-EM data collection, refinement, and validation statistics.**

|                                                                     | TRPM8 <sup>MM</sup><br>PIP <sub>2</sub> +Ca <sup>2+</sup><br>(PDB-9B6J, EMD-44261)<br>Full map | TRPM8 <sup>MM</sup><br>ΔPIP <sub>2</sub> +Ca <sup>2+</sup><br>(PDB-9B6K, EMD-44262)<br>Full map | TRPM8 <sup>MM</sup><br>apo D state<br>(PDB-9B6D, EMD-44255)<br>Full map | TRPM8 <sup>MM</sup><br>TC-I<br>(PDB-9B6E, EMD-44256)<br>Full map |
|---------------------------------------------------------------------|------------------------------------------------------------------------------------------------|-------------------------------------------------------------------------------------------------|-------------------------------------------------------------------------|------------------------------------------------------------------|
| <b>Data collection and Processing</b>                               |                                                                                                |                                                                                                 |                                                                         |                                                                  |
| Microscope                                                          | Titan Krios                                                                                    | Titan Krios                                                                                     | Titan Krios                                                             | Titan Krios                                                      |
| Voltage (keV)                                                       | 300                                                                                            | 300                                                                                             | 300                                                                     | 300                                                              |
| Camera                                                              | K3                                                                                             | K3                                                                                              | K3                                                                      | K3                                                               |
| Nominal magnification*                                              | 81,000×                                                                                        | 81,000×                                                                                         | 81,000×                                                                 | 81,000×                                                          |
| Physical pixel size (Å pixel <sup>-1</sup> )*                       | 1.08                                                                                           | 1.08                                                                                            | 1.1                                                                     | 1.08                                                             |
| Total electron exposure (e <sup>-</sup> Å <sup>-2</sup> )           | 60                                                                                             | 60                                                                                              | 53                                                                      | 60                                                               |
| Exposure rate (e <sup>-</sup> pixel <sup>-1</sup> s <sup>-1</sup> ) | 15                                                                                             | 15                                                                                              | 17                                                                      | 30                                                               |
| Number of frames                                                    | 60                                                                                             | 60                                                                                              | 53                                                                      | 40                                                               |
| Defocus range (μm)                                                  | -0.7 to -2.2                                                                                   | -0.7 to -2.2                                                                                    | -0.7 to -2.5                                                            | -0.7 to -2.2                                                     |
| Automation software                                                 | Latitude                                                                                       | Latitude                                                                                        | EPU                                                                     | Latitude                                                         |
| Energy filter slit width (eV)                                       | 20                                                                                             | 20                                                                                              | 20                                                                      | 20                                                               |
| Micrographs collected (no.)                                         | 10,045                                                                                         | 9,400                                                                                           | 10,568                                                                  | 9,581                                                            |
| Micrographs used (no.)                                              | 9,261                                                                                          | 9,381                                                                                           | 8,844                                                                   | 9,471                                                            |
| Total extracted particles (no.)                                     | 3,143,850                                                                                      | 3,345,503                                                                                       | 2,405,897                                                               | 2,896,859                                                        |
| <b>Reconstruction</b>                                               |                                                                                                |                                                                                                 |                                                                         |                                                                  |
| Refined particles (no.)                                             | 1,371,900                                                                                      | 1,974,786                                                                                       | 1,415,860                                                               | 1,601,803                                                        |
| Final particles (no.)                                               | 103,487                                                                                        | 35,327                                                                                          | 87,176                                                                  | 194,290                                                          |
| Symmetry imposed                                                    | C4                                                                                             | C4                                                                                              | C4                                                                      | C4                                                               |
| Resolution (global, Å)                                              | 3.53 Å                                                                                         | 4.13 Å                                                                                          | 3.30 Å                                                                  | 2.91 Å                                                           |
| FSC 0.5 (unmasked/masked)                                           | 4.5 / 3.9 Å                                                                                    | 7.4 / 4.2 Å                                                                                     | 4.1 / 3.6 Å                                                             | 3.7 / 3.3 Å                                                      |
| FSC 0.143 (unmasked/masked)                                         | 4.0 / 3.5 Å                                                                                    | 4.2 / 3.6 Å                                                                                     | 3.7 / 3.3 Å                                                             | 3.3 / 2.9 Å                                                      |
| Map sharpening B-factor (Å <sup>2</sup> )                           | -60                                                                                            | -139                                                                                            | -75                                                                     | -40                                                              |
| Map sharpening methods                                              | global sharpening                                                                              | global sharpening                                                                               | global sharpening                                                       | global sharpening                                                |
| <b>Model composition</b>                                            |                                                                                                |                                                                                                 |                                                                         |                                                                  |
| Protein residues                                                    | 3584                                                                                           | 3676                                                                                            | 3732                                                                    | 3720                                                             |
| Ligand                                                              | 4                                                                                              | 0                                                                                               | 20                                                                      | 20                                                               |
| Ion                                                                 | 4                                                                                              | 4                                                                                               | 0                                                                       | 0                                                                |
| <b>Model refinement</b>                                             |                                                                                                |                                                                                                 |                                                                         |                                                                  |
| Refinement package                                                  | Coot, PHENIX                                                                                   | Coot, PHENIX                                                                                    | Coot, PHENIX                                                            | Coot, PHENIX                                                     |
| Map Correlation Coefficient                                         | 0.71                                                                                           | 0.68                                                                                            | 0.80                                                                    | 0.76                                                             |
| B factors (Å <sup>2</sup> )                                         |                                                                                                |                                                                                                 |                                                                         |                                                                  |
| Protein residues                                                    | 164.83                                                                                         | 147.85                                                                                          | 92.78                                                                   | 120.65                                                           |
| Ligands                                                             | 178.70                                                                                         | 124.95                                                                                          | 51.26                                                                   | 85.68                                                            |
| R.m.s. deviations                                                   |                                                                                                |                                                                                                 |                                                                         |                                                                  |
| Bond lengths (Å)                                                    | 0.004                                                                                          | 0.002                                                                                           | 0.003                                                                   | 0.003                                                            |
| Bond angles (°)                                                     | 0.703                                                                                          | 0.461                                                                                           | 0.686                                                                   | 0.753                                                            |
| <b>Validation</b>                                                   |                                                                                                |                                                                                                 |                                                                         |                                                                  |
| MolProbity score                                                    | 1.65                                                                                           | 1.72                                                                                            | 1.51                                                                    | 1.62                                                             |
| Clashscore (all atoms)                                              | 11.87                                                                                          | 8.05                                                                                            | 5.16                                                                    | 5.6                                                              |
| Poor rotamers (%)                                                   | 0.00 %                                                                                         | 0.96 %                                                                                          | 0.30 %                                                                  | 0.00 %                                                           |
| Ramachandran                                                        |                                                                                                |                                                                                                 |                                                                         |                                                                  |
| Outliers                                                            | 0.00 %                                                                                         | 0.00 %                                                                                          | 0.00 %                                                                  | 0.00 %                                                           |
| Allowed                                                             | 2.29 %                                                                                         | 4.12 %                                                                                          | 3.53 %                                                                  | 4.61 %                                                           |
| Favored                                                             | 97.71 %                                                                                        | 95.88 %                                                                                         | 96.47 %                                                                 | 95.39 %                                                          |

|                                                                     | TRPM8 <sub>MM</sub><br>_AMG<br>(PDB-9B6F, EMD-<br>44257)<br>Full map | TRPM8 <sub>MM</sub><br>_AMTB<br>(PDB-9B6G, EMD-<br>44258)<br>Full map | TRPM8 <sub>MM</sub><br>_TC-I+C3<br>(PDB-9B6H, EMD-<br>44259)<br>Full map | TRPM8 <sub>PM</sub><br>_TC-I<br>(PDB-9B6I, EMD-<br>44260)<br>Full map |
|---------------------------------------------------------------------|----------------------------------------------------------------------|-----------------------------------------------------------------------|--------------------------------------------------------------------------|-----------------------------------------------------------------------|
| <b>Data collection and Processing</b>                               |                                                                      |                                                                       |                                                                          |                                                                       |
| Microscope                                                          | Titan Krios                                                          | Titan Krios                                                           | Titan Krios                                                              | Titan Krios                                                           |
| Voltage (keV)                                                       | 300                                                                  | 300                                                                   | 300                                                                      | 300                                                                   |
| Camera                                                              | K3                                                                   | K3                                                                    | K3                                                                       | K3                                                                    |
| Nominal magnification*                                              | 81,000×                                                              | 81,000×                                                               | 81,000×                                                                  | 81,000×                                                               |
| Physical pixel size (Å pixel <sup>-1</sup> )*                       | 1.1                                                                  | 1.08                                                                  | 1.08                                                                     | 1.08                                                                  |
| Total electron exposure (e <sup>-</sup> Å <sup>-2</sup> )           | 53                                                                   | 60                                                                    | 60                                                                       | 60                                                                    |
| Exposure rate (e <sup>-</sup> pixel <sup>-1</sup> s <sup>-1</sup> ) | 17                                                                   | 30                                                                    | 30                                                                       | 30                                                                    |
| Number of frames                                                    | 53                                                                   | 40                                                                    | 40                                                                       | 40                                                                    |
| Defocus range (μm)                                                  | -0.7 to -2.5                                                         | -0.7 to -2.2                                                          | -0.7 to -2.2                                                             | -0.7 to -2.2                                                          |
| Automation software                                                 | EPU                                                                  | Latitude                                                              | Latitude                                                                 | Latitude                                                              |
| Energy filter slit width (eV)                                       | 20                                                                   | 20                                                                    | 20                                                                       | 20                                                                    |
| Micrographs collected (no.)                                         | 9,395                                                                | 10,053                                                                | 14,226                                                                   | 10,266                                                                |
| Micrographs used (no.)                                              | 8,793                                                                | 9,798                                                                 | 14,059                                                                   | 9717                                                                  |
| Total extracted particles (no.)                                     | 2,608,765                                                            | 3,194,454                                                             | 4,913,002                                                                | 3,535,129                                                             |
| <b>Reconstruction</b>                                               |                                                                      |                                                                       |                                                                          |                                                                       |
| Refined particles (no.)                                             | 1,220,108                                                            | 1,517,018                                                             | 2,031,558                                                                | 1,567,180                                                             |
| Final particles (no.)                                               | 84,589                                                               | 67,871                                                                | 112,062                                                                  | 82,123                                                                |
| Symmetry imposed                                                    | C4                                                                   | C4                                                                    | C4                                                                       | C4                                                                    |
| Resolution (global, Å)                                              | 3.42 Å                                                               | 2.81 Å                                                                | 2.76 Å                                                                   | 3.26 Å                                                                |
| FSC 0.5 (unmasked/masked)                                           | 4.2 / 3.8 Å                                                          | 3.9 / 3.3 Å                                                           | 3.9 / 3.3 Å                                                              | 4.1 / 3.6 Å                                                           |
| FSC 0.143 (unmasked/masked)                                         | 3.8 / 3.4 Å                                                          | 3.3 / 2.8 Å                                                           | 3.3 / 2.8 Å                                                              | 3.6 / 3.3 Å                                                           |
| Map sharpening B-factor (Å <sup>2</sup> )                           | -75                                                                  | -50                                                                   | -30                                                                      | -60                                                                   |
| Map sharpening methods                                              | global sharpening                                                    | global sharpening                                                     | global sharpening                                                        | global sharpening                                                     |
| <b>Model composition</b>                                            |                                                                      |                                                                       |                                                                          |                                                                       |
| Protein residues                                                    | 3716                                                                 | 3664                                                                  | 3736                                                                     | 3424                                                                  |
| Ligand                                                              | 20                                                                   | 28                                                                    | 24                                                                       | 20                                                                    |
| Ion                                                                 | 0                                                                    | 0                                                                     | 0                                                                        | 4                                                                     |
| <b>Model refinement</b>                                             |                                                                      |                                                                       |                                                                          |                                                                       |
| Refinement package                                                  | Coot, PHENIX                                                         | Coot, PHENIX                                                          | Coot, PHENIX                                                             | Coot, PHENIX                                                          |
| Map Correlation Coefficient                                         | 0.81                                                                 | 0.73                                                                  | 0.76                                                                     | 0.81                                                                  |
| B factors (Å <sup>2</sup> )                                         |                                                                      |                                                                       |                                                                          |                                                                       |
| Protein residues                                                    | 112.20                                                               | 128.13                                                                | 118.52                                                                   | 78.70                                                                 |
| Ligands                                                             | 58.39                                                                | 93.97                                                                 | 99.87                                                                    | 32.82                                                                 |
| R.m.s. deviations                                                   |                                                                      |                                                                       |                                                                          |                                                                       |
| Bond lengths (Å)                                                    | 0.003                                                                | 0.003                                                                 | 0.004                                                                    | 0.003                                                                 |
| Bond angles (°)                                                     | 0.703                                                                | 0.704                                                                 | 0.706                                                                    | 0.698                                                                 |
| <b>Validation</b>                                                   |                                                                      |                                                                       |                                                                          |                                                                       |
| MolProbity score                                                    | 1.50                                                                 | 1.42                                                                  | 1.61                                                                     | 1.40                                                                  |
| Clashscore (all atoms)                                              | 5.1                                                                  | 5.4                                                                   | 7.51                                                                     | 5.42                                                                  |
| Poor rotamers (%)                                                   | 0.31 %                                                               | 0.00 %                                                                | 0.44 %                                                                   | 0.27 %                                                                |
| Ramachandran                                                        |                                                                      |                                                                       |                                                                          |                                                                       |
| Outliers                                                            | 0.00 %                                                               | 0.00 %                                                                | 0.00 %                                                                   | 0.00 %                                                                |
| Allowed                                                             | 3.52 %                                                               | 2.68 %                                                                | 3.17 %                                                                   | 2.52 %                                                                |
| Favored                                                             | 96.48 %                                                              | 97.32 %                                                               | 96.83 %                                                                  | 97.48 %                                                               |

\*Calibrated pixel size at the detector
